# Supplementary material
Source: publisher figshare collection journal article supplement (https://acs.figshare.com/ndownloader/files/4737415)

## Table of Contents of the Supporting Information

|                                                                                           |     |
|-------------------------------------------------------------------------------------------|-----|
| Table of contents.....                                                                    | S1  |
| Title, authors and address.....                                                           | S3  |
| General information.....                                                                  | S3  |
| Synthesis of aromatic nitroalkenes.....                                                   | S4  |
| Synthesis of aliphatic nitroalkenes .....                                                 | S5  |
| Synthesis of racemic nitroalkanes.....                                                    | S5  |
| General procedure for the enantioselective addition of Et <sub>2</sub> Zn.....            | S6  |
| General procedure for the enantioselective addition of Me <sub>2</sub> Zn.....            | S6  |
| Specific experimental conditions, characterization data and chromatograms of<br>compound: |     |
| <b>5a</b> .....                                                                           | S7  |
| <b>5b</b> .....                                                                           | S8  |
| <b>5c</b> .....                                                                           | S9  |
| <b>5d</b> .....                                                                           | S10 |
| <b>5e</b> .....                                                                           | S11 |
| <b>5f</b> .....                                                                           | S12 |
| <b>5g</b> .....                                                                           | S13 |
| <b>5h</b> .....                                                                           | S14 |
| <b>5i</b> .....                                                                           | S15 |
| <b>5j</b> .....                                                                           | S16 |
| <b>6b</b> .....                                                                           | S17 |
| <sup>1</sup> H NMR of compound <b>5a</b> .....                                            | S18 |
| <sup>13</sup> C NMR of compound <b>5a</b> .....                                           | S19 |
| <sup>1</sup> H NMR of compound <b>5b</b> .....                                            | S20 |
| <sup>13</sup> C NMR of compound <b>5b</b> .....                                           | S21 |
| <sup>1</sup> H NMR of compound <b>5c</b> .....                                            | S22 |
| <sup>13</sup> C NMR of compound <b>5c</b> .....                                           | S23 |
| <sup>1</sup> H NMR of compound <b>5d</b> .....                                            | S24 |

|                                                 |     |
|-------------------------------------------------|-----|
| <sup>13</sup> C NMR of compound <b>5d</b> ..... | S25 |
| <sup>1</sup> H NMR of compound <b>5e</b> .....  | S26 |
| <sup>13</sup> C NMR of compound <b>5e</b> ..... | S27 |
| <sup>1</sup> H NMR of compound <b>5f</b> .....  | S28 |
| <sup>13</sup> C NMR of compound <b>5f</b> ..... | S29 |
| <sup>1</sup> H NMR of compound <b>5g</b> .....  | S30 |
| <sup>13</sup> C NMR of compound <b>5g</b> ..... | S31 |
| <sup>1</sup> H NMR of compound <b>5h</b> .....  | S32 |
| <sup>13</sup> C NMR of compound <b>5h</b> ..... | S33 |
| <sup>1</sup> H NMR of compound <b>5i</b> .....  | S34 |
| <sup>13</sup> C NMR of compound <b>5i</b> ..... | S35 |
| <sup>1</sup> H NMR of compound <b>5j</b> .....  | S36 |
| <sup>13</sup> C NMR of compound <b>5j</b> ..... | S37 |
| <sup>1</sup> H NMR of compound <b>6b</b> .....  | S38 |
| <sup>13</sup> C NMR of compound <b>6b</b> ..... | S39 |

## Supporting Information

### Application of Chiral Bis(phosphine) Monoxide Ligand to Catalytic Enantioselective Addition of Dialkylzinc Reagents to $\beta$ -Nitroalkenes

Alexandre Côté, Vincent N. G. Lindsay and André B. Charette\*,

*Département de Chimie, Université de Montréal, P.O. Box 6128, Station Downtown,  
Québec, Canada H3C 3J7*

Experimental procedures. Characterization data.  $^1\text{H}$  and  $^{13}\text{C}$  NMR spectra.

**General:** All non-aqueous reactions were run under an inert atmosphere (nitrogen or argon) with rigid exclusion of moisture from reagents and glassware using standard techniques for manipulating air-sensitive compounds.<sup>1</sup> All glassware was stored in the oven and/or was flame-dried prior to use under an inert atmosphere of gas. Anhydrous solvents were obtained either by filtration through drying columns (THF, ether,  $\text{CH}_2\text{Cl}_2$ , benzene, DMF,  $\text{CH}_3\text{CN}$ , toluene, hexane, methanol) on a GlassContour system (Irvine, CA), by distillation over calcium hydride ( $\text{Et}_3\text{N}$ ,  $\text{ClCH}_2\text{CH}_2\text{Cl}$ , pyridine, diisopropylamine, isopropanol) or by distillation over sodium/benzophenone (DME, 1,4-dioxane). Analytical thin-layer chromatography (TLC) was performed on precoated, glass-backed silica gel (Merck 60 F254). Visualization of the developed chromatogram was performed by UV absorbance, aqueous cerium molybdate, ethanolic phosphomolybdic acid, iodine, or aqueous potassium permanganate. Flash column chromatography was performed using 230-400 mesh silica (EM Science or Silicycle) of the indicated solvent system according to standard technique.<sup>2</sup> Melting points were obtained on a Buchi melting point apparatus and are uncorrected. Infrared spectra were taken on a Perkin Elmer Spectrum One FTIR and are reported in reciprocal centimeters ( $\text{cm}^{-1}$ ). Nuclear magnetic resonance spectra ( $^1\text{H}$ ,  $^{13}\text{C}$ , DEPT 135, COSY, HMQC, NOESY) were recorded either on a Bruker AV 300, AMX 300, AV 400, ARX 400, or DMX 600 spectrometer. Chemical shifts for  $^1\text{H}$  NMR spectra are recorded in parts per million from tetramethylsilane with the solvent resonance as the internal standard (chloroform,  $\delta$  7.27 ppm). Data are reported as follows: chemical shift, multiplicity (s = singlet, d = doublet, t = triplet, q = quartet, qn = quintet, sx = sextet, sep = septet, o = octet, n = nonet, m = multiplet and br = broad), coupling constant in Hz, integration, and assignment. Chemical shifts for  $^{13}\text{C}$  NMR spectra are recorded in parts per million from tetramethylsilane using the central

<sup>1</sup> Shriver, D.F.; Drezdson, M. A. the manipulation of air-sensitive compounds; 2nd ed.; Wiley: New York, 1986.

<sup>2</sup> Still, W. C.; Kahn, M.; Mitra, A. *J. Org. Chem.* **1978**, *43*, 2923–2925.

peak of deuteriochloroform (77.00 ppm) as the internal standard. All spectra were obtained with complete proton decoupling. When ambiguous, proton and carbon assignments were established using COSY, HMQC and DEPT experiments. Optical rotations were determined with a Perkin-Elmer 341 polarimeter at 589 or 546 nm. Data are reported as follows:  $[\alpha]_{\lambda}$  temp, concentration (c in g/100 mL), and solvent. High resolution mass spectra were performed by the Centre régional de spectroscopie de masse de l'Université de Montréal. Combustion analyses were performed by the Laboratoire d'analyse élémentaire de l'Université de Montréal. Analytical gas chromatography was carried out on a Hewlett Packard 5880A gas chromatograph equipped with a splitless mode capillary injector and a flame ionization detector or with an Agilent 6890 Series GC system equipped with an Agilent 5973 EI mass detector. Unless otherwise noted, the injector and detector temperatures were set to 250 °C and hydrogen was used as the carrier gas (63 psi). Data are reported as follows: (column type, column length, initial-final temperature, rate: retention time ( $t_r$ )).

**Reagents:** Unless otherwise stated, commercial reagents were used without purification. The nitroalkenes **4b**, **4c**, **4d**, **4e**, **4i**, **4j** were synthesized using the appropriate general procedure (aromatic or aliphatic substrates). Commercial nitroalkenes were purified by crystallization in a mixture of Et<sub>2</sub>O and Hexane (The traces of impurities in commercial reagents slightly affect the reproducibility of the reactions). The **2a** ligand (BozPHOS or Me-DuPHOS monoxide)<sup>3</sup> and the (**2a**)<sub>2</sub>CuOTf complex<sup>4</sup> were synthesized according to previously reported procedures.

**General procedure for the synthesis of aromatic nitroalkenes 4b, 4c, 4d and 4e.**  
(Modified literature procedure<sup>5</sup>)

To a stirred solution of NH<sub>4</sub>OAc (8.73 g, 113.3 mmol) in AcOH (67.0 mL) in a flame-dried, round-bottomed 200 mL flask equipped with a condenser and a football-shaped magnetic stirring bar (under Ar atmosphere) was added CH<sub>3</sub>NO<sub>2</sub> (17.6 mL, 326.5 mmol) followed by the aldehyde (47.4 mmol) at room temperature. The clear slightly yellow solution was then heated to 100 °C using an oil bath for 5 h 30 min. The resulting dark-orange solution was allowed to cool to room temperature and poured in H<sub>2</sub>O (200 mL). The pH was then regulated to 7 using NaOH<sub>(aq)</sub> 2M, and the resulting aqueous phase was extracted with 4 x 100 mL EtOAc. The combined organic layers were dried on MgSO<sub>4</sub>, filtered and concentrated under vacuum to give the crude nitroalkene as a brown solid. In order to get the pure (*E*)-nitroalkene, this solid was further crystallized using 10% EtOAc in hexane as solvent, and filtered at boiling point temperature to remove brown oily impurities, affording the desired compound as pale yellow needles.

<sup>3</sup> Boezio, A. A.; Pytkowicz, J.; Côté, A.; Charette, A. B. *J. Am. Chem. Soc.* **2003**, *125*, 14260–14261.

<sup>4</sup> Côté, A.; Charette, A. B. *J. Org. Chem.* **2005**, *70*, 10864–10867.

<sup>5</sup> Andrey, O.; Alexakis, A.; Bernardinelli, G. *Org. Lett.* **2003**, *5*, 2559–2561.

**General procedure for the synthesis of aliphatic nitroalkenes 4i and 4j**(Modified literature procedure<sup>6</sup>)

In a flame-dried, round-bottomed 100 mL flask equipped with an egg-shaped magnetic stirring bar (under Ar atmosphere) were added at 0 °C the aldehyde (39.0 mmol), THF (10.0 mL), *t*-BuOH (10.0 mL) and CH<sub>3</sub>NO<sub>2</sub> (3.2 mL, 58.5 mmol). Vigorous stirring was maintained to obtain a colorless clear solution. Then *t*-BuOK (0.438 g, 3.9 mmol) was added in one portion, and the solution was allowed to stir at this temperature for 15 minutes before the ice bath was removed. The solution allowed to stir at room temperature for 16 additional hours. The resulting light green-yellow solution was poured in H<sub>2</sub>O (130 mL) and extracted with 4 x 80 mL *t*-BuOMe. The combined organic layers were washed with H<sub>2</sub>O (130 mL), sat. NaCl<sub>(aq)</sub> (100 mL), dried on MgSO<sub>4</sub>, filtered on celite and concentrated under vacuum to give the crude β-nitroalcohol as a light yellow oil. In a flame-dried, round-bottomed 100 mL flask equipped with an egg-shaped magnetic stirring bar (under Ar atmosphere), a solution of the crude β-nitroalcohol (39.0 mmol) in dry CH<sub>2</sub>Cl<sub>2</sub> (50.0 mL) was prepared. When temperature reached -10 °C, TFAA (5.50 mL, 39.0 mmol) was added dropwise. The resulting clear light yellow solution was allowed to stir for exactly 2 minutes before Et<sub>3</sub>N (10.9 mL, 78.0 mmol) was added over 15 minutes at -10 °C. The solution was stirred for an additional 35 minutes at this temperature before being diluted in CH<sub>2</sub>Cl<sub>2</sub> (200 mL) and washed with 2 x 100 mL sat. NH<sub>4</sub>Cl<sub>(aq)</sub>. The aqueous layer was separated and extracted with 2 x 50 mL CH<sub>2</sub>Cl<sub>2</sub>. All organic layers were combined, washed with 100 mL sat. NaCl<sub>(aq)</sub>, dried on MgSO<sub>4</sub>, filtered and concentrated under vacuum, giving the crude nitroalkene as a dark-yellow oil. Flash column chromatography using 5% EtOAc in Hexane as eluent (*R*<sub>f</sub> = 0.40) gave the desired compound as a light yellow oil.

**General procedure for the synthesis of racemic nitroalkanes**

(CAUTION: Et<sub>2</sub>Zn IS EXTREMELY PYROPHORIC, GAS-TIGHT SYRINGES ONLY)

In a flame-dried, round-bottomed 5 mL flask equipped with an egg-shaped magnetic stirring bar (under Ar atmosphere) was added the β-nitroalkene (0.515 mmol) and anhydrous CuCN (23.1 mg, 0.258 mmol). Dry Et<sub>2</sub>O (3.5 mL) was then added, and the resulting heterogeneous milky solution was allowed to stir for 10 minutes at room temperature. Neat Et<sub>2</sub>Zn (106 μL, 1.031 mmol) was then added dropwise, and the solution was allowed to stir for 2 hours at room temperature. Excess Et<sub>2</sub>Zn was quenched by slow addition of 1.0 mL MeOH (caution: exothermic ethane formation). The resulting solution was poured in 20 mL sat. NH<sub>4</sub>Cl<sub>(aq)</sub> and extracted with 3 x 15 mL CH<sub>2</sub>Cl<sub>2</sub>. The combined organic layers were dried on Na<sub>2</sub>SO<sub>4</sub>, filtered and concentrated under vacuum to give the crude racemic nitroalkane as a brown oily residue. Flash column chromatography using 20% Et<sub>2</sub>O in Hexane as eluent gave the pure racemic nitroalkane as a colorless oil.

<sup>6</sup> Denmark, S. E.; Marcin, L. R. *J. Org. Chem.* **1993**, 58, 3850–3856.

### General procedure for the enantioselective catalytic addition of Et<sub>2</sub>Zn to nitroalkenes

(CAUTION: Et<sub>2</sub>Zn IS EXTREMELY PYROPHORIC, GAS-TIGHT SYRINGES ONLY)

In a glove-box under Ar atmosphere, a flame-dried, pear-shaped 10 mL flask equipped with an egg-shaped magnetic stirring bar was charged with the β-nitroalkene (1.00 mmol), (2a)<sub>2</sub>CuOTf (10.7 mg, 0.0125 mmol) and 2a (8.1 mg, 0.025 mmol) (*Note: The results in Table 3 were obtained by replacing this 0.025 mmol of 2a with 0.200 mmol of the additive*). The flask was closed with a rubber septum, taken out of the glove-box and dry Et<sub>2</sub>O (5.0 mL, 0.2 M concentration of substrate) was added to afford a heterogeneous pale yellow solution which was then stirred for another 30 minutes at room temperature before being allowed to cool to -70 °C for 45 minutes using a cryostat ethanol bath. Neat Et<sub>2</sub>Zn (205 μL, 2.00 mmol) was added dropwise (within 10 seconds) at -70 °C, and the resulting dark-yellow heterogeneous solution was allowed to stir for 16 hours at this temperature (at medium stirring). Excess Et<sub>2</sub>Zn was quenched by slow addition of 2.0 mL MeOH at -70 °C (caution: exothermic ethane formation) to the clear light yellow solution. It was then stirred for 5 minutes at this temperature and slowly warmed to room temperature. The resulting mixture was poured in 30 mL sat. NH<sub>4</sub>Cl<sub>(aq)</sub> and extracted with 3 x 30 mL CH<sub>2</sub>Cl<sub>2</sub>. The combined organic layers were dried on Na<sub>2</sub>SO<sub>4</sub>, filtered and concentrated under vacuum to give the crude nitroalkane as a light-brown oil. Flash column chromatography using 20% Et<sub>2</sub>O in Hexane as eluent afforded the pure compound as a colorless oil.

### General procedure for the enantioselective catalytic addition of Me<sub>2</sub>Zn to nitroalkenes

(CAUTION: Me<sub>2</sub>Zn IS EXTREMELY PYROPHORIC, GAS-TIGHT SYRINGES ONLY)

In a glove-box under Ar atmosphere, a flame-dried, round-bottomed 5 mL flask equipped with an egg-shaped magnetic stirring bar was charged with β-nitroalkene (0.50 mmol), (2a)<sub>2</sub>CuOTf (5.4 mg, 0.00625 mmol) and 2a (4.0 mg, 0.0125 mmol). The flask was closed with a rubber septum, taken out of the glove-box and dry CH<sub>2</sub>Cl<sub>2</sub> (2.5 mL, 0.2 M concentration of substrate) was added to afford a clear yellow solution, which was stirred for another 30 minutes at room temperature before being allowed to cool to -40 °C for 45 minutes using a cryostat ethanol bath. Neat Me<sub>2</sub>Zn (172 μL, 2.50 mmol) was then added dropwise (within 10 seconds) at -40 °C, and the resulting heterogeneous dark-yellow solution was allowed to stir for 48 hours at this temperature (at medium stirring). Excess Me<sub>2</sub>Zn was quenched by slow addition of 3.0 mL MeOH at -40 °C (caution: exothermic methane formation) to the clear light-yellow solution. It was then stirred for 5 minutes at this temperature and slowly warmed to room temperature. The resulting mixture was poured in 20 mL sat. NH<sub>4</sub>Cl<sub>(aq)</sub> and extracted with 3 x 20 mL CH<sub>2</sub>Cl<sub>2</sub>. The combined organic layers were dried on Na<sub>2</sub>SO<sub>4</sub>, filtered and concentrated under vacuum to give the crude nitroalkane as a light-brown oil. Flash column chromatography using 20% Et<sub>2</sub>O in Hexane as eluent afforded the pure compound as a colorless oil.

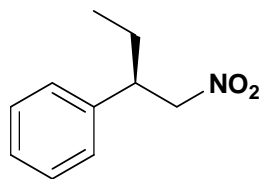**[(1*R*)-1-(nitromethyl)propyl]benzene (5a).** (colorless oil)

The specific procedure for the addition of  $\text{Et}_2\text{Zn}$  described in the experimental section was followed. Isolated yield 92%, 95% ee. GC analysis of the product on chiral stationary phase ( $\gamma$ -dex, 30 m, 115 °C isotherm): (*S*)-**5a**  $t_r$  = 41.21 min, (*R*)-**5a**  $t_r$  = 42.43 min).  $R_f$  0.40 (20%  $\text{Et}_2\text{O}$  in Hexane);  $^1\text{H}$  NMR ( $\text{CDCl}_3$ , 300 MHz):  $\delta$  7.36-7.22 (m, 3H, ArH), 7.21-7.15 (m, 2H, ArH), 4.62-4.48 (m, 2H,  $\text{CH}_2\text{NO}_2$ ), 3.41-3.30 (m, 1H, ArCHCH $_2\text{NO}_2$ ), 1.80-1.62 (m, 2H,  $\text{CH}_2\text{CH}_3$ ), 0.83 (t,  $J$  = 7.6 Hz, 3H,  $\text{CH}_2\text{CH}_3$ );  $^{13}\text{C}$  NMR ( $\text{CDCl}_3$ , 75 MHz):  $\delta$  140.2, 129.8, 128.5, 128.4, 81.6, 46.9, 27.0, 12.4. All spectral data are consistent with the literature values.<sup>7,8</sup>

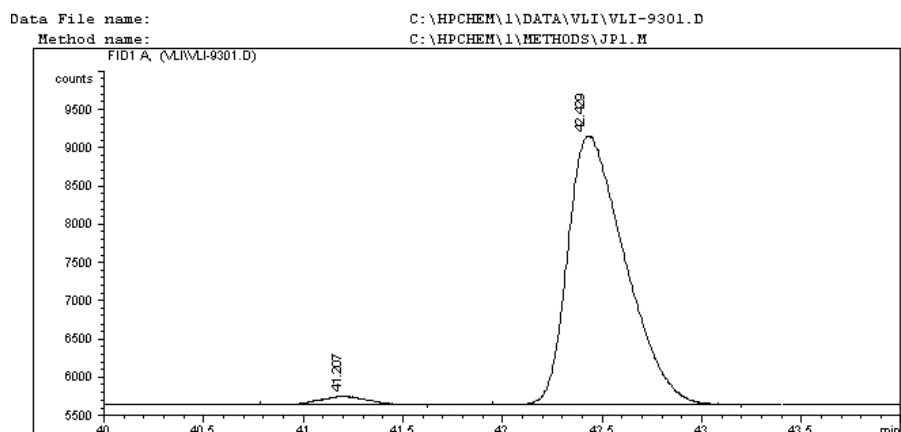

| Meas. RT<br>min | Area<br>mAU*sec | Height<br>mAU | Area<br>% | Width<br>min | Symm. |
|-----------------|-----------------|---------------|-----------|--------------|-------|
| 41.21           | 1904.1          | 109.4         | 2.6       | 0.290        | 1.031 |
| 42.43           | 7009->          | 3511.3        | 97.4      | 0.333        | 0.530 |

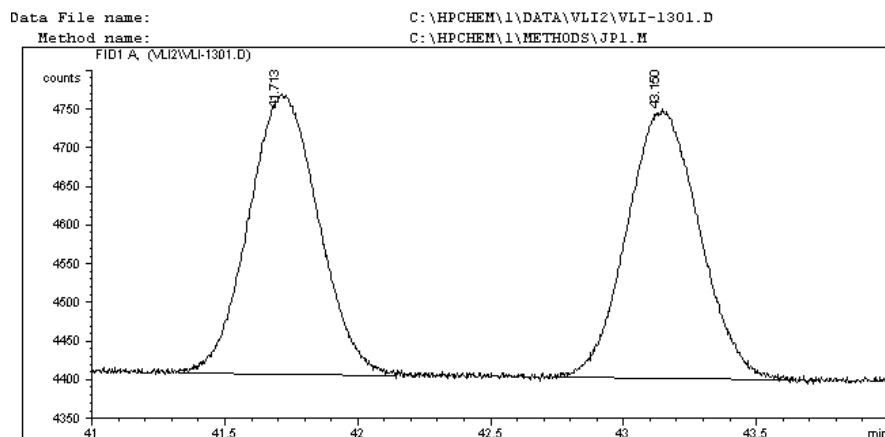

| Meas. RT<br>min | Area<br>mAU*sec | Height<br>mAU | Area<br>% | Width<br>min | Symm. |
|-----------------|-----------------|---------------|-----------|--------------|-------|
| 41.71           | 6601.3          | 363.1         | 50.0      | 0.303        | 0.884 |
| 43.15           | 6613.6          | 349.5         | 50.0      | 0.315        | 0.974 |

<sup>7</sup> Mampreian, D. M.; Hoveyda, A. H. *Org. Lett.* **2004**, 6, 2829–2832.

<sup>8</sup> Choi, H.; Hua, Z.; Ojima, I. *Org. Lett.* **2004**, 6, 2689–2691.

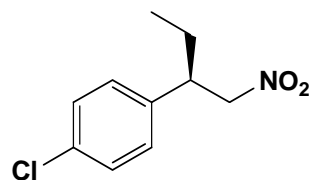**1-chloro-4-[(1*R*)-1-(nitromethyl)propyl]benzene (5b).**

(colorless oil)

The specific procedure for the addition of  $\text{Et}_2\text{Zn}$  described in the experimental section was followed. Isolated yield 93%, 98% ee.

GC analysis of the product on chiral stationary phase ( $\gamma$ -dex, 30 m, 120-160 °C, 0.5 °C/min): (*S*)-**5b**  $t_r$  = 55.41 min, (*R*)-**5b**  $t_r$  = 56.24 min.  $R_f$  0.37 (20%  $\text{Et}_2\text{O}$  in Hexane);  $^1\text{H}$  NMR ( $\text{CDCl}_3$ , 300 MHz):  $\delta$  7.31 (d,  $J$  = 8.4 Hz, 2H, ArH), 7.13 (d,  $J$  = 8.4 Hz, 2H, ArH), 4.63-4.45 (m, 2H,  $\text{CH}_2\text{NO}_2$ ), 3.41-3.29 (m, 1H, ArCHCH $_2\text{NO}_2$ ), 1.81-1.58 (m, 2H,  $\text{CH}_2\text{CH}_3$ ), 0.83 (dd,  $J$  = 7.5, 7.5 Hz, 3H,  $\text{CH}_2\text{CH}_3$ );  $^{13}\text{C}$  NMR ( $\text{CDCl}_3$ , 75 MHz):  $\delta$  137.8, 133.1, 128.9, 128.8, 80.3, 45.2, 25.0, 11.3. All spectral data are consistent with the literature values.<sup>7</sup>

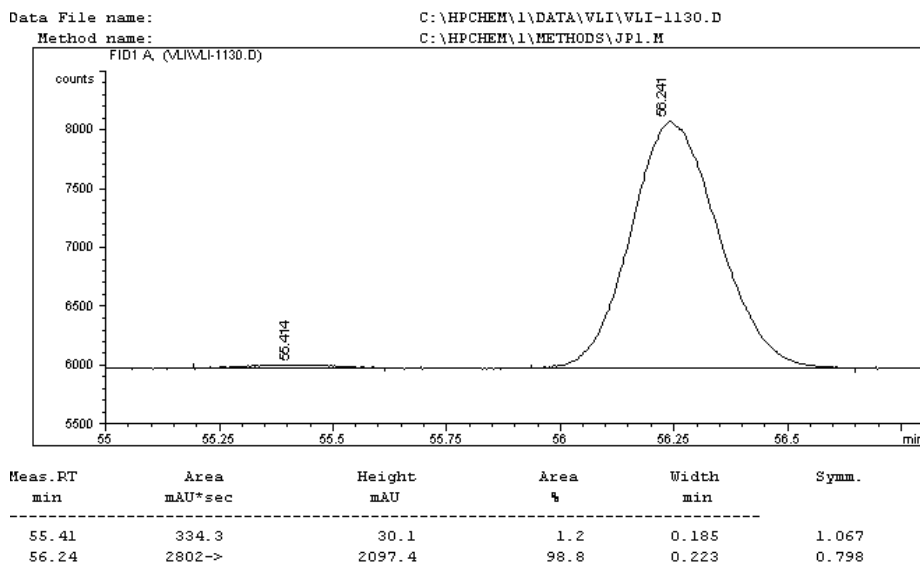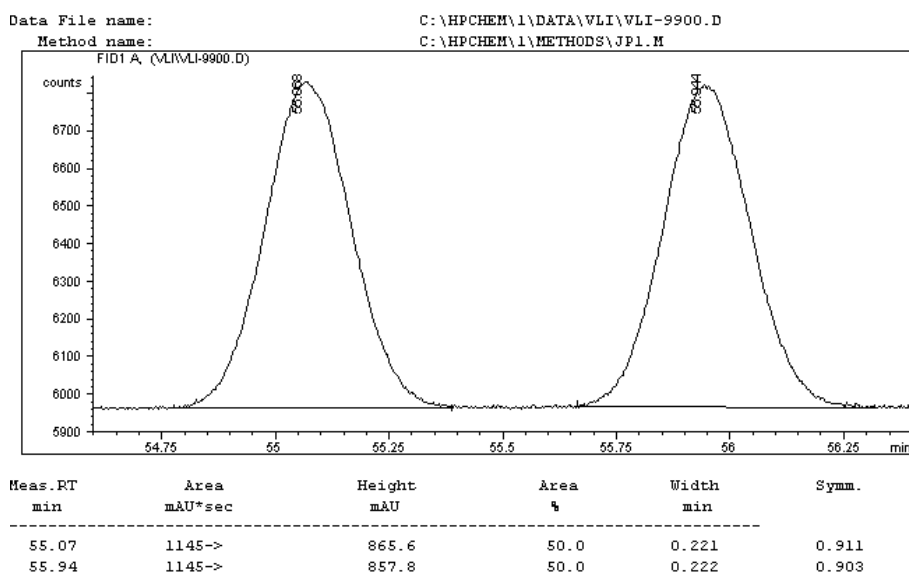



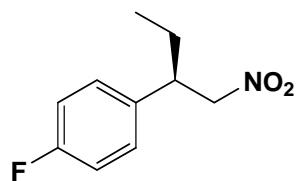**1-fluoro-4-[(1*R*)-1-(nitromethyl)propyl]benzene (5c).**

(colorless oil)

A modified procedure for the addition of  $\text{Et}_2\text{Zn}$ , different from the one described in the experimental section, was followed, in which the reaction was run at  $-60\text{ }^\circ\text{C}$ . Isolated yield 99%, 96% ee. GC analysis of the product on chiral stationary phase ( $\gamma$ -dex, 30 m,  $120\text{--}170\text{ }^\circ\text{C}$ ,  $0.5\text{ }^\circ\text{C/min}$ ): (*S*)-**5c**  $t_r = 27.40\text{ min}$ , (*R*)-**5c**  $t_r = 27.99\text{ min}$ .  $R_f$  0.36 (20%  $\text{Et}_2\text{O}$  in Hexane);  $^1\text{H NMR}$  ( $\text{CDCl}_3$ , 300 MHz):  $\delta$  7.21–7.13 (m, 2H, ArH), 7.07–6.98 (m, 2H, ArH), 4.63–4.47 (m, 2H,  $\text{CH}_2\text{NO}_2$ ), 3.42–3.29 (m, 1H,  $\text{ArCHCH}_2\text{NO}_2$ ), 1.82–1.57 (m, 2H,  $\text{CH}_2\text{CH}_3$ ), 0.83 (dd,  $J = 7.5, 7.5\text{ Hz}$ , 3H,  $\text{CH}_2\text{CH}_3$ );  $^{13}\text{C NMR}$  ( $\text{CDCl}_3$ , 75 MHz):  $\delta$  162.0 (d, 246.0 Hz), 135.0 (d,  $J = 3.2\text{ Hz}$ ), 129.0 (d,  $J = 8.1\text{ Hz}$ ), 115.6 (d,  $J = 21.3\text{ Hz}$ ), 80.6, 45.2, 26.1, 11.4. All spectral data are consistent with the literature values.<sup>8</sup>

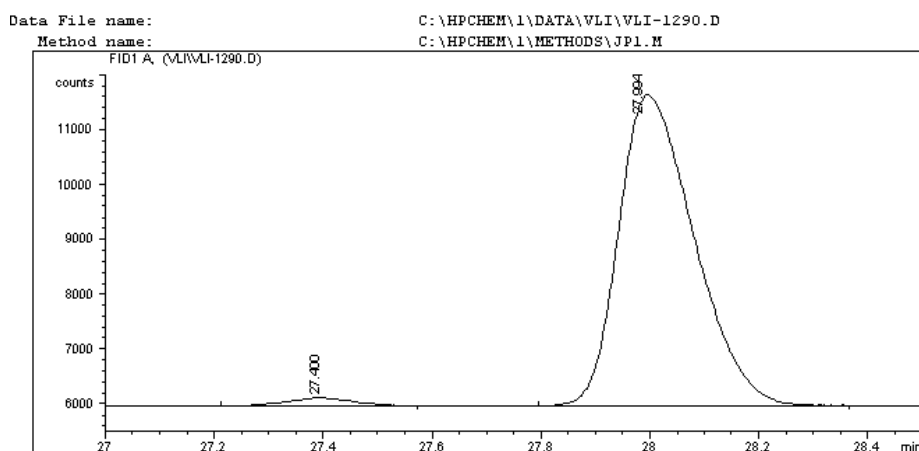

| Meas. RT<br>min | Area<br>mAU*sec | Height<br>mAU | Area<br>% | Width<br>min | Symm. |
|-----------------|-----------------|---------------|-----------|--------------|-------|
| 27.40           | 1177.3          | 137.1         | 2.1       | 0.143        | 1.129 |
| 27.99           | 5433->          | 5659.9        | 97.9      | 0.160        | 0.593 |

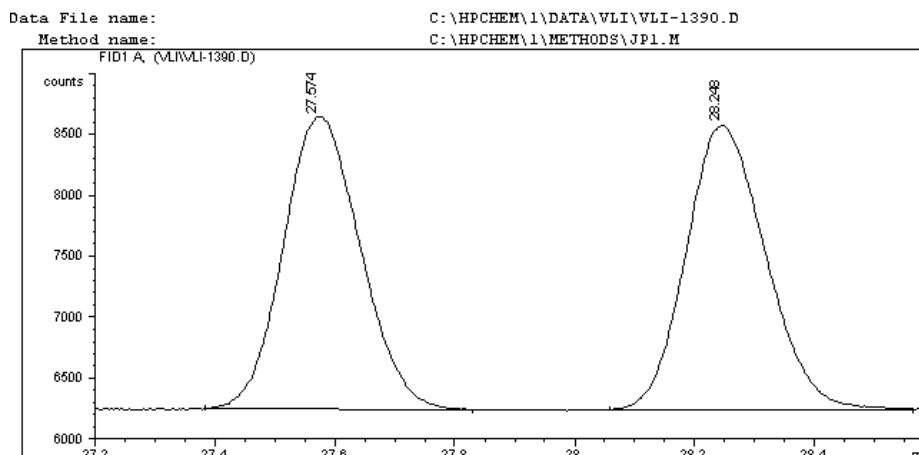

| Meas. RT<br>min | Area<br>mAU*sec | Height<br>mAU | Area<br>% | Width<br>min | Symm. |
|-----------------|-----------------|---------------|-----------|--------------|-------|
| 27.57           | 2149->          | 2402.5        | 50.0      | 0.149        | 0.864 |
| 28.25           | 2148->          | 2325.8        | 50.0      | 0.154        | 0.858 |

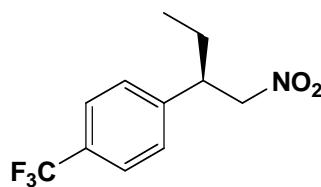

**1-[(1*R*)-1-(nitromethyl)propyl]-4-(trifluoromethyl)benzene (5d).** (colorless oil)

*A modified procedure for the addition of Et<sub>2</sub>Zn, different from the one described in the experimental section, was followed, in which the reaction was run at -60 °C. Isolated yield 92%, 94% ee.* GC analysis of the product on chiral stationary phase ( $\gamma$ -dex, 30 m, 120-170 °C, 0.5 °C/min): (*S*)-**5d**  $t_r$  = 27.04 min, (*R*)-**5d**  $t_r$  = 27.72 min.  $R_f$  0.33 (20% Et<sub>2</sub>O in Hexane); <sup>1</sup>H NMR (CDCl<sub>3</sub>, 300 MHz):  $\delta$  7.61 (d,  $J$  = 8.1 Hz, 2H, ArH), 7.33 (d,  $J$  = 8.1 Hz, 2H, ArH), 4.68-4.51 (m, 2H, CH<sub>2</sub>NO<sub>2</sub>), 3.52-3.39 (m, 1H, ArCHCH<sub>2</sub>NO<sub>2</sub>), 1.80-1.62 (m, 2H, CH<sub>2</sub>CH<sub>3</sub>), 0.84 (dd,  $J$  = 7.5, 7.5 Hz, 3H, CH<sub>2</sub>CH<sub>3</sub>); <sup>13</sup>C NMR (CDCl<sub>3</sub>, 75 MHz):  $\delta$  143.6, 129.7 (q,  $J$  = 32.3 Hz), 128.0, 125.7 (q,  $J$  = 3.8 Hz), 124.0 (q,  $J$  = 271.6 Hz), 80.0, 45.7, 26.0, 11.3. All spectral data are consistent with the literature values.<sup>8</sup>

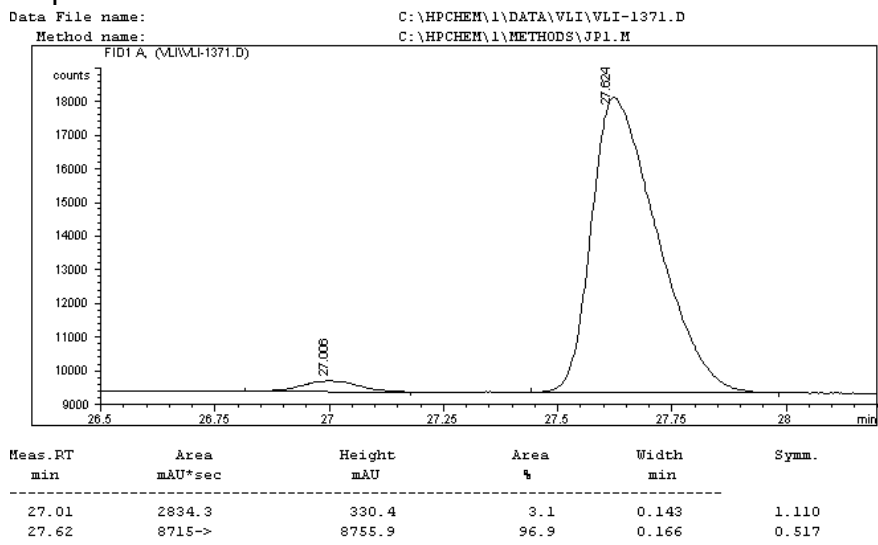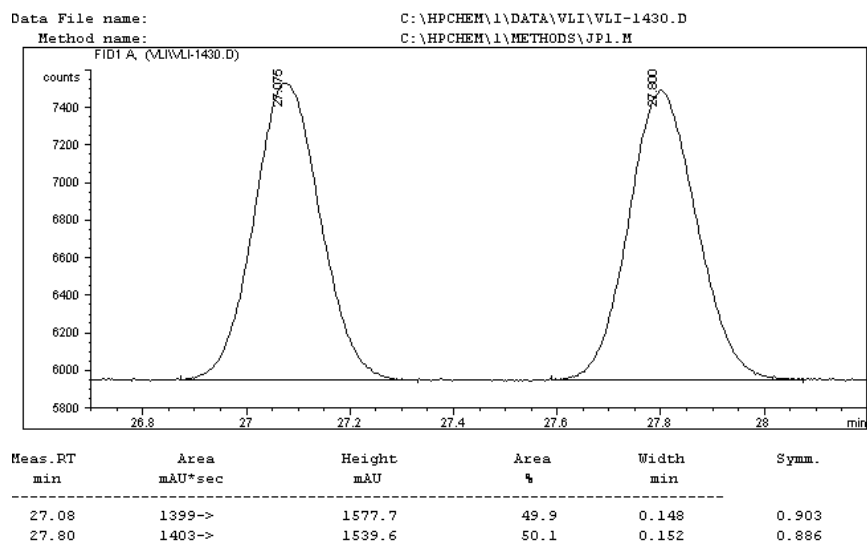

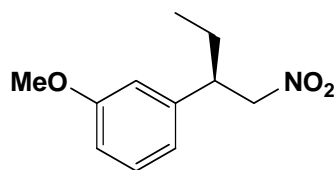**1-methoxy-3-[(1*R*)-1-(nitromethyl)propyl]benzene (5e).**

(colorless oil)

A modified procedure for the addition of  $\text{Et}_2\text{Zn}$ , different from the one described in the experimental section, was followed, in which the reaction being run at  $-60^\circ\text{C}$  and at a 0.1M concentration of substrate. Isolated yield 98%, 95% ee. GC analysis of the product on chiral stationary phase ( $\gamma$ -dex, 30 m, 120-160  $^\circ\text{C}$ , 0.2  $^\circ\text{C}/\text{min}$ ): (*S*)-**5e**  $t_r$  = 78.32 min, (*R*)-**5e**  $t_r$  = 79.26 min.  $R_f$  0.31 (20%  $\text{Et}_2\text{O}$  in Hexane);  $^1\text{H}$  NMR ( $\text{CDCl}_3$ , 300 MHz):  $\delta$  7.26 (t,  $J$  = 8.1 Hz, 1H, ArH), 6.85-6.72 (m, 3H, ArH), 4.62-4.49 (m, 2H,  $\text{CH}_2\text{NO}_2$ ), 3.40-3.28 (m, 1H, ArCHCH $_2\text{NO}_2$ ), 1.80-1.62 (m, 2H,  $\text{CH}_2\text{CH}_3$ ), 0.85 (dd,  $J$  = 7.5, 7.5 Hz, 3H,  $\text{CH}_2\text{CH}_3$ );  $^{13}\text{C}$  NMR ( $\text{CDCl}_3$ , 75 MHz):  $\delta$  159.7, 140.8, 129.7, 119.6, 113.5, 112.2, 80.4, 54.9, 45.8, 25.9, 11.3. All spectral data are consistent with the literature values.<sup>8</sup>

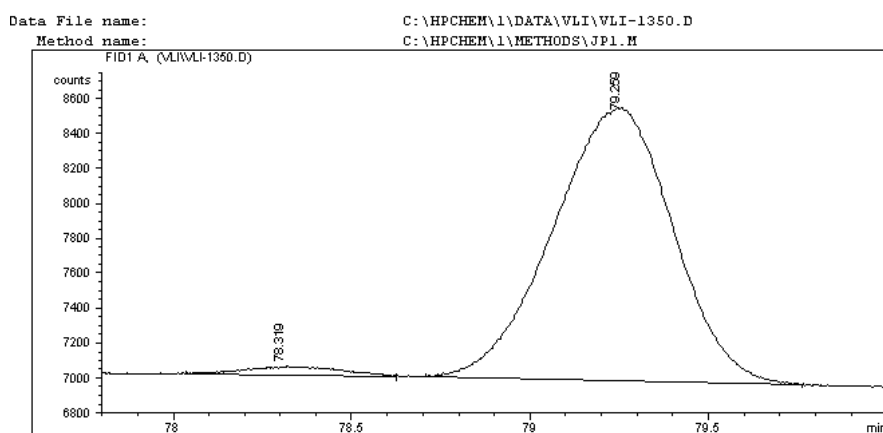

| Meas. RT<br>min | Area<br>mAU*sec | Height<br>mAU | Area<br>% | Width<br>min | Symm. |
|-----------------|-----------------|---------------|-----------|--------------|-------|
| 78.32           | 932.4           | 49.9          | 2.5       | 0.311        | 0.775 |
| 79.26           | 3644->          | 1563.0        | 97.5      | 0.389        | 1.311 |

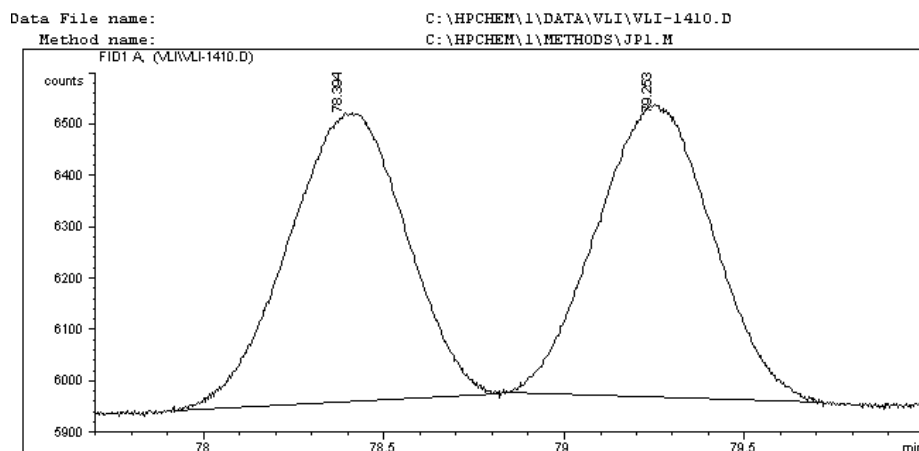

| Meas. RT<br>min | Area<br>mAU*sec | Height<br>mAU | Area<br>% | Width<br>min | Symm. |
|-----------------|-----------------|---------------|-----------|--------------|-------|
| 78.39           | 1280->          | 563.7         | 50.1      | 0.379        | 0.961 |
| 79.25           | 1278->          | 571.9         | 49.9      | 0.372        | 1.001 |

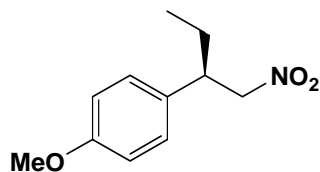**1-methoxy-4-[(1*R*)-1-(nitromethyl)propyl]benzene (5f).**

(pale yellow oil)

A modified procedure for the addition of  $\text{Et}_2\text{Zn}$ , different from the one described in the experimental section, was followed, in which the reaction was run at  $-60\text{ }^\circ\text{C}$ . Isolated yield 95%, 89% ee. GC analysis of the product on chiral stationary phase ( $\gamma$ -dex, 30 m,  $120\text{--}160\text{ }^\circ\text{C}$ ,  $0.2\text{ }^\circ\text{C/min}$ ): (*S*)-**5f**  $t_r = 89.84\text{ min}$ , (*R*)-**5f**  $t_r = 91.08\text{ min}$ .  $R_f$  0.26 (20%  $\text{Et}_2\text{O}$  in Hexane);  $^1\text{H NMR}$  ( $\text{CDCl}_3$ , 300 MHz):  $\delta$  7.16–7.08 (m, 2H, ArH), 6.91–6.84 (m, 2H, ArH), 4.60–4.46 (m, 2H,  $\text{CH}_2\text{NO}_2$ ), 3.37–3.26 (m, 1H, ArCHCH $_2\text{NO}_2$ ), 1.80–1.58 (m, 2H,  $\text{CH}_2\text{CH}_3$ ), 0.84 (dd,  $J = 7.5, 7.5\text{ Hz}$ , 3H,  $\text{CH}_2\text{CH}_3$ );  $^{13}\text{C NMR}$  ( $\text{CDCl}_3$ , 75 MHz):  $\delta$  158.7, 131.0, 128.4, 114.0, 80.8, 55.0, 45.1, 26.0, 11.3. All spectral data are consistent with the literature values.<sup>7, 8</sup>

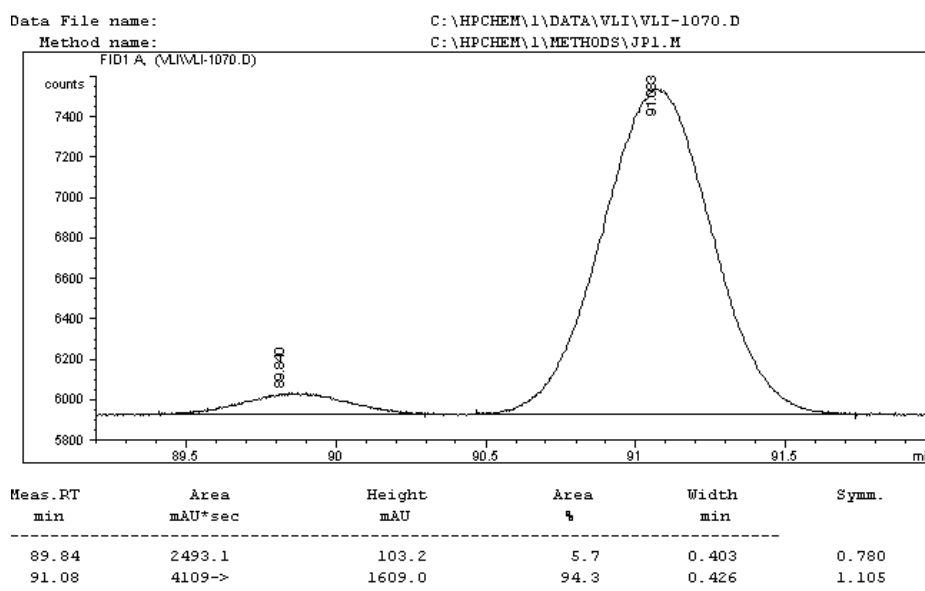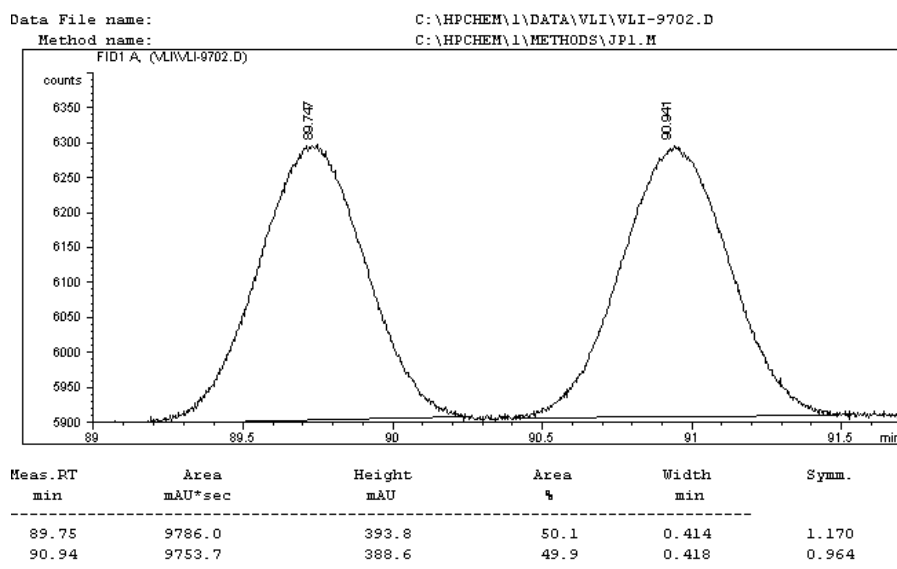

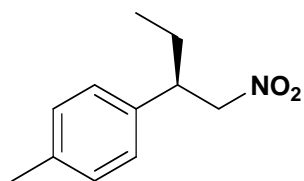**1-methyl-4-[(1*R*)-1-(nitromethyl)propyl]benzene (5g).**

(colorless oil)

The specific procedure for the addition of  $\text{Et}_2\text{Zn}$  described in the experimental section was followed. Isolated yield 89%, 95% ee.

GC analysis of the product on chiral stationary phase ( $\gamma$ -dex, 30 m, 110-140 °C, 0.5 °C/min): (*S*)-**5g**  $t_r$  = 45.61 min, (*R*)-**5g**  $t_r$  = 46.27 min.  $R_f$  0.42 (20%  $\text{Et}_2\text{O}$  in Hexane);  $^1\text{H}$  NMR ( $\text{CDCl}_3$ , 400 MHz):  $\delta$  7.17 (d,  $J$  = 8.0 Hz, 2H, ArH), 7.10 (d,  $J$  = 8.0 Hz, 2H, ArH), 4.62-4.51 (m, 2H,  $\text{CH}_2\text{NO}_2$ ), 3.38-3.27 (m, 1H, ArCHCH $_2\text{NO}_2$ ), 2.35 (s, 3 H, ArCH $_3$ ), 1.81-1.65 (m, 2H,  $\text{CH}_2\text{CH}_3$ ), 0.86 (dd,  $J$  = 7.6, 7.6 Hz, 3H,  $\text{CH}_2\text{CH}_3$ );  $^{13}\text{C}$  NMR ( $\text{CDCl}_3$ , 75 MHz):  $\delta$  137.3, 136.3, 129.7, 127.5, 81.0, 45.8, 26.2, 21.1, 11.7. All spectral data are consistent with the literature values.<sup>8</sup>

Data File name: C:\HPCHEM\1\DATA\VLI\VLI-1010.D  
Method name: C:\HPCHEM\1\METHODS\JPL1.M

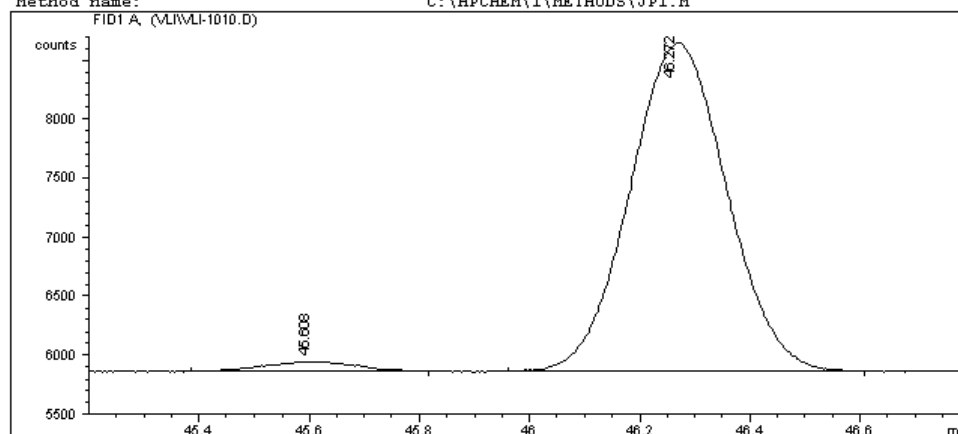

| Meas. RT<br>min | Area<br>mAU*sec | Height<br>mAU | Area<br>% | Width<br>min | Symm. |
|-----------------|-----------------|---------------|-----------|--------------|-------|
| 45.61           | 938.3           | 82.4          | 2.7       | 0.190        | 1.125 |
| 46.27           | 3402->          | 2790.8        | 97.3      | 0.203        | 1.007 |

Data File name: C:\HPCHEM\1\DATA\VLI\VLI-9502.D  
Method name: C:\HPCHEM\1\METHODS\JPL1.M

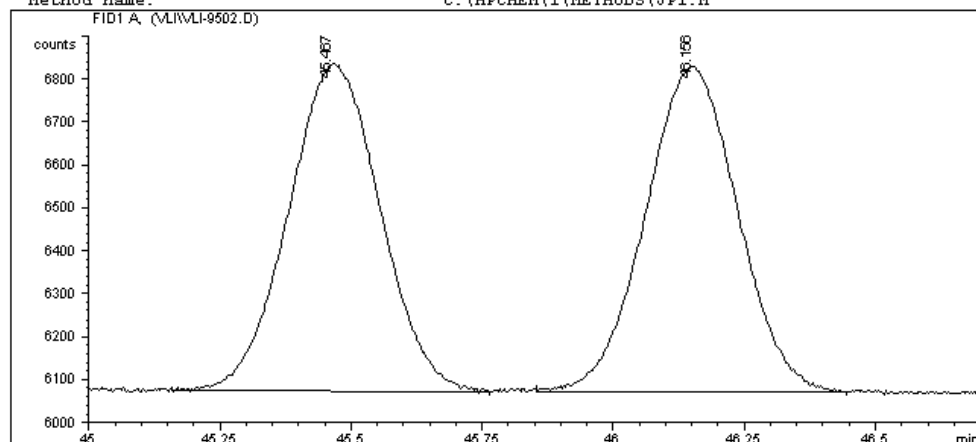

| Meas. RT<br>min | Area<br>mAU*sec | Height<br>mAU | Area<br>% | Width<br>min | Symm. |
|-----------------|-----------------|---------------|-----------|--------------|-------|
| 45.47           | 9265.9          | 760.7         | 50.1      | 0.203        | 0.966 |
| 46.16           | 9237.7          | 758.9         | 49.9      | 0.203        | 1.097 |

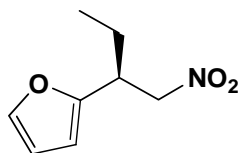**2-[(1S)-1-(nitromethyl)propyl]furan (5h).** (pale yellow oil)

The specific procedure for the addition of  $\text{Et}_2\text{Zn}$  described in the experimental section was followed. Isolated yield 90%, 83% ee. GC analysis of the product on chiral stationary phase ( $\gamma$ -dex, 30 m, 120 °C isotherm): (*S*)-**5h**  $t_r = 10.67$  min, (*R*)-**5h**  $t_r = 10.86$  min.  $R_f$  0.54 (20%  $\text{Et}_2\text{O}$  in Hexane);  $^1\text{H}$  NMR ( $\text{CDCl}_3$ , 300 MHz):  $\delta$  7.39-7.32 (m, 1H, ArH), 6.34-6.27 (m, 1H, ArH), 6.17-6.11 (m, 1H, ArH), 4.67-4.49 (m, 2H,  $\text{CH}_2\text{NO}_2$ ), 3.58-3.47 (m, 1H, ArCHCH $_2\text{NO}_2$ ), 1.83-1.64 (m, 2H,  $\text{CH}_2\text{CH}_3$ ), 0.90 (dd,  $J = 7.5, 7.5$  Hz, 3H,  $\text{CH}_2\text{CH}_3$ );  $^{13}\text{C}$  NMR ( $\text{CDCl}_3$ , 75 MHz):  $\delta$  152.3, 142.1, 110.2, 107.2, 78.2, 39.4, 24.1, 11.2. All spectral data are consistent with the literature values.<sup>7, 8</sup>

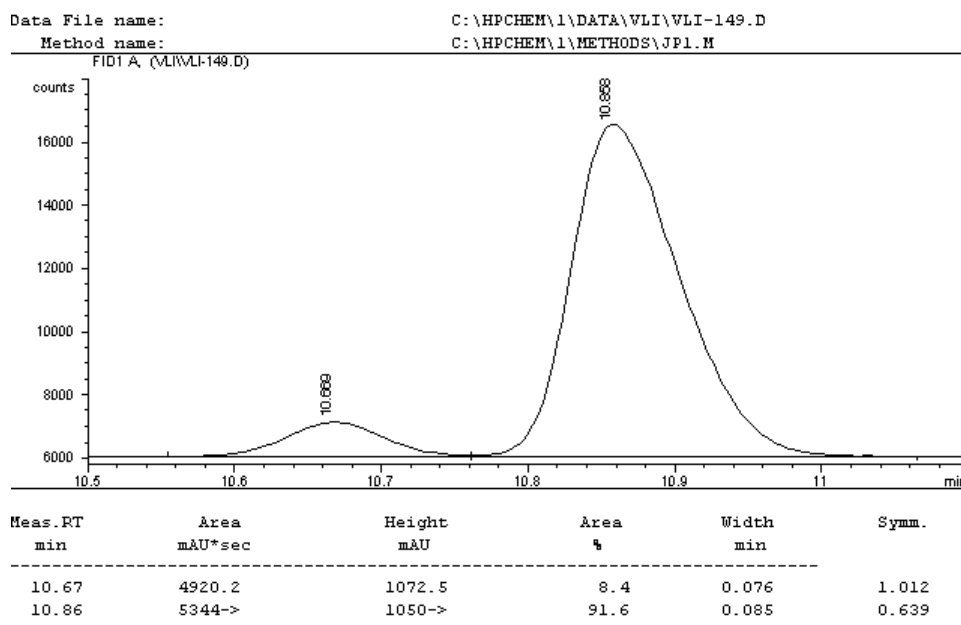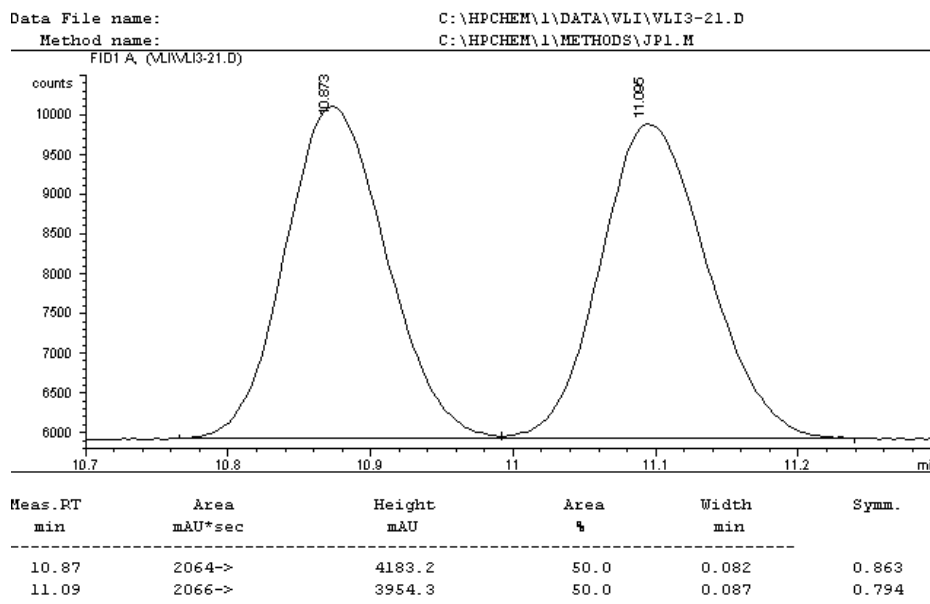

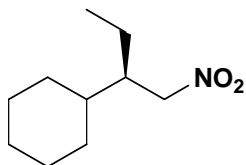**[(1*R*)-1-(nitromethyl)propyl]cyclohexane (5i).** (colorless oil)

A modified procedure for the addition of  $\text{Et}_2\text{Zn}$ , different from the one described in the experimental section, was followed, in which the substrate was added continuously over a period of 12 hours to the  $\text{CuOTf}/\mathbf{2a}/\text{Et}_2\text{Zn}/\text{Et}_2\text{O}$  solution at  $-70^\circ\text{C}$  and the resulting solution was stirred for 4 additional hours. Isolated yield 70%, 98% ee. GC analysis of the product on chiral stationary phase ( $\gamma$ -dex, 30 m,  $100^\circ\text{C}$  isotherm): (*S*)-**5i**  $t_r = 71.07$  min, (*R*)-**5i**  $t_r = 71.82$  min.  $R_f$  0.59 (20%  $\text{Et}_2\text{O}$  in Hexane);  $^1\text{H}$  NMR ( $\text{CDCl}_3$ , 300 MHz):  $\delta$  4.44-4.35 (m, 1H,  $\text{CHHNO}_2$ ), 4.31-4.22 (m, 1H,  $\text{CHHNO}_2$ ), 2.09-1.97 (m, 1H,  $(\text{C}_6\text{H}_{11})\text{CHCH}_2\text{NO}_2$ ), 1.83-0.95 (m, 13H,  $\text{C}_6\text{H}_{11}$  and  $\text{CH}_2\text{CH}_3$ ), 0.92 (dd,  $J = 7.5, 7.5$  Hz, 3H,  $\text{CH}_2\text{CH}_3$ );  $^{13}\text{C}$  NMR ( $\text{CDCl}_3$ , 75 MHz):  $\delta$  77.6, 44.2, 38.3, 29.6, 29.2, 26.4, 26.4, 26.4, 21.3, 11.3. All spectral data are consistent with the literature values.<sup>7</sup>

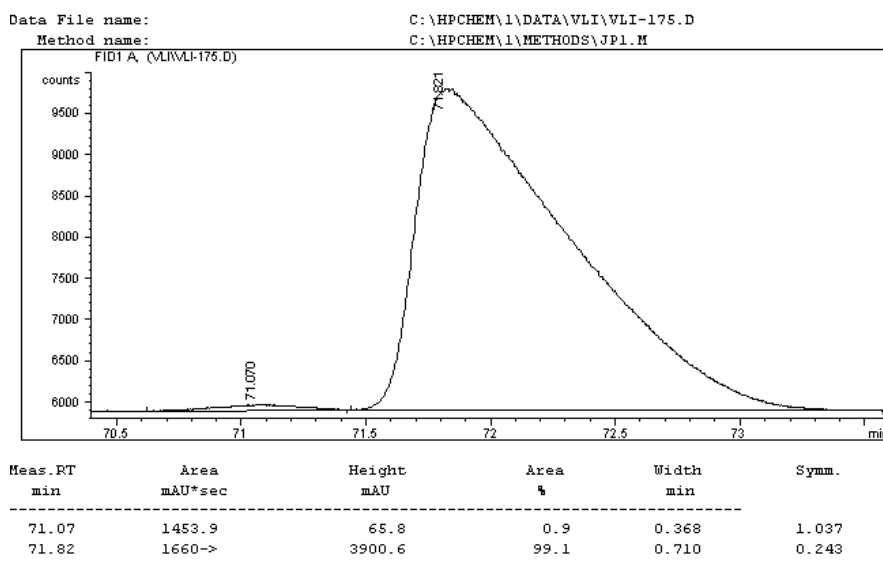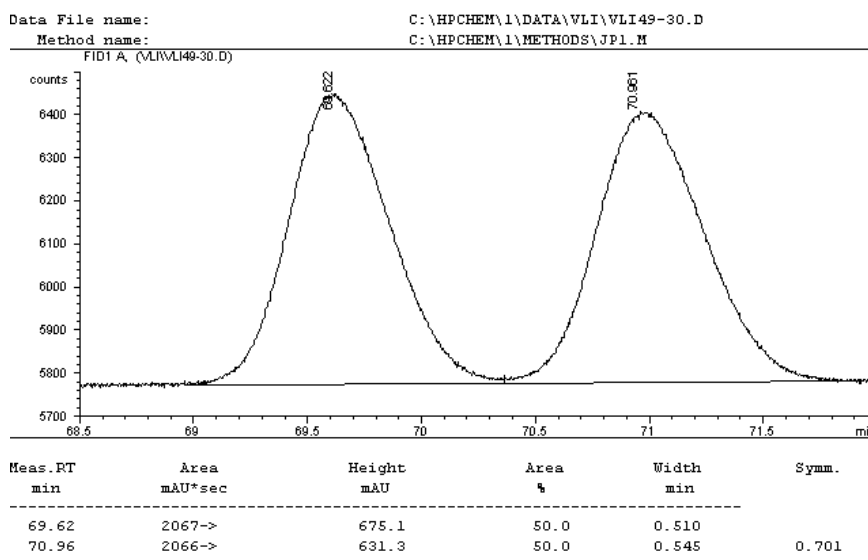

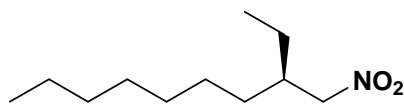**(3*R*)-3-(nitromethyl)decane (5j).** (colorless oil)

The specific procedure for the addition of  $\text{Et}_2\text{Zn}$  described in the experimental section was followed. Isolated yield 91%, 95% ee. GC analysis of the product on chiral stationary phase ( $\beta$ -dex, 30 m, 100 °C isotherm): (*S*)-**5j**  $t_r$  = 51.52 min, (*R*)-**5j**  $t_r$  = 52.10 min.  $R_f$  0.64 (20%  $\text{Et}_2\text{O}$  in Hexane);  $^1\text{H}$  NMR ( $\text{CDCl}_3$ , 300 MHz):  $\delta$  4.30 (d,  $J$  = 6.9 Hz, 2H,  $\text{CH}_2\text{NO}_2$ ), 2.20-2.05 (m, 1H, (*n*- $\text{C}_7\text{H}_{15}$ ) $\text{CHCH}_2\text{NO}_2$ ), 1.49-1.15 (m, 14H, aliphatic  $\text{CH}_2$ ), 0.92 (t,  $J$  = 7.5 Hz, 3H,  $\text{CH}_3$ ), 0.87 (t,  $J$  = 6.0 Hz, 3H,  $\text{CH}_3$ );  $^{13}\text{C}$  NMR ( $\text{CDCl}_3$ , 75 MHz):  $\delta$  79.2, 38.7, 31.7, 30.7, 29.5, 29.1, 26.1, 23.8, 22.6, 13.0, 10.3. All spectral data are consistent with the literature values.<sup>7</sup>

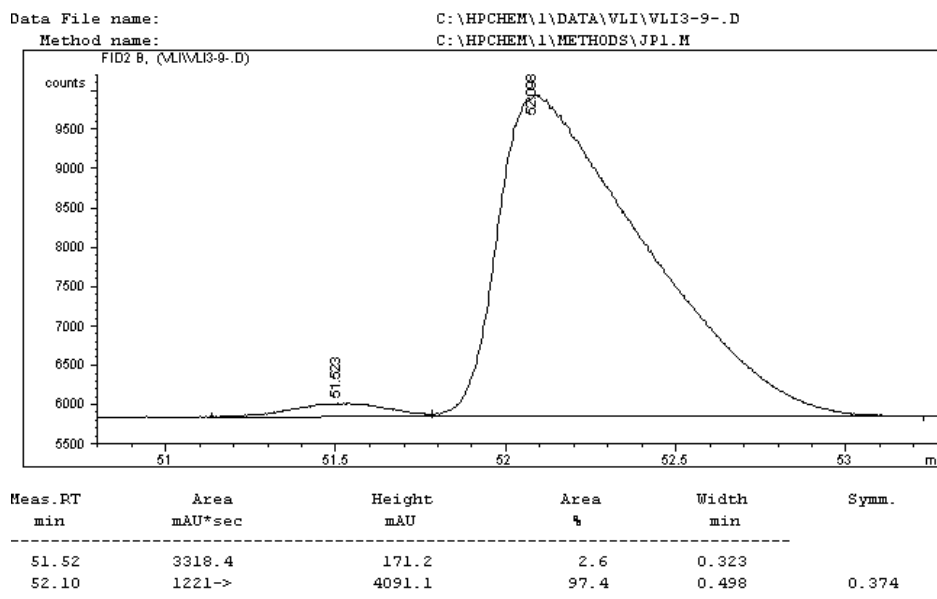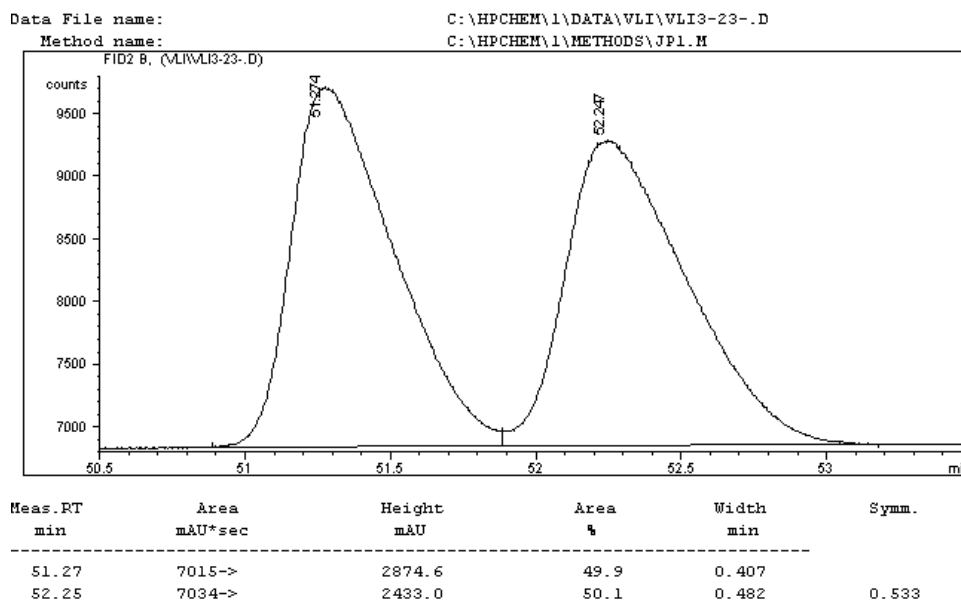



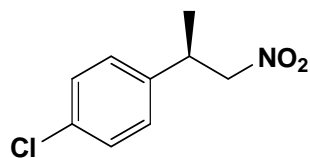**1-Chloro-4-[(1*R*)-1-methyl-2-nitroethyl]benzene (6b).**

(colorless oil)

The specific procedure for the addition of  $\text{Me}_2\text{Zn}$  described in the experimental section was followed. Isolated yield 95%, 92% ee. GC analysis of the product on chiral stationary phase ( $\gamma$ -dex, 30 m, 120-160 °C, 0.5 °C/min): (*S*)-**6b**  $t_r$  = 47.14 min, (*R*)-**6b**  $t_r$  = 47.56 min.  $R_f$  0.35 (20%  $\text{Et}_2\text{O}$  in Hexane);  $^1\text{H}$  NMR ( $\text{CDCl}_3$ , 300 MHz):  $\delta$  7.36-7.28 (m, 2H, ArH), 7.22-7.13 (m, 2H, ArH), 4.57-4.44 (m, 2H,  $\text{CH}_2\text{NO}_2$ ), 3.70-3.56 (m, 1H, ArCHCH $_2\text{NO}_2$ ), 1.37 (d,  $J$  = 6.9 Hz, 3H,  $\text{CH}_3$ );  $^{13}\text{C}$  NMR ( $\text{CDCl}_3$ , 75 MHz):  $\delta$  139.3, 133.3, 129.1, 128.2, 81.5, 38.0, 18.6. All spectral data are consistent with the literature values.<sup>7</sup>

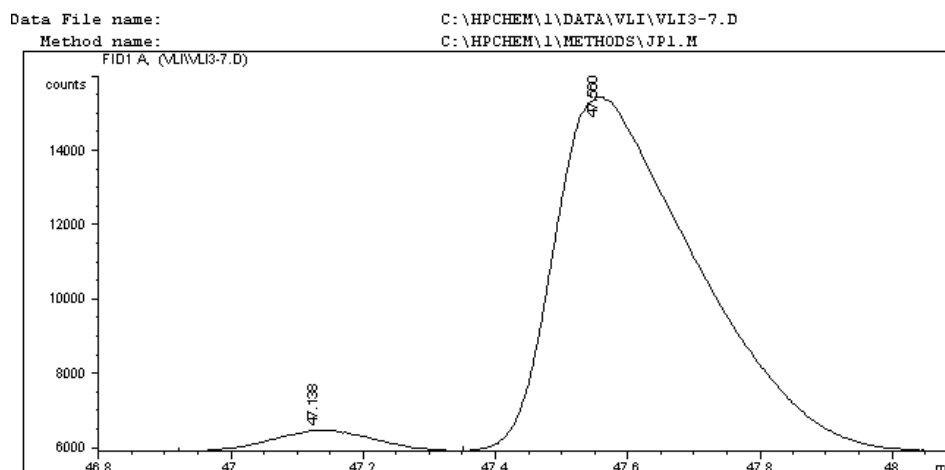

| Meas. RT<br>min | Area<br>mAU*sec | Height<br>mAU | Area<br>% | Width<br>min | Symm. |
|-----------------|-----------------|---------------|-----------|--------------|-------|
| 47.14           | 5861.8          | 546.6         | 4.0       | 0.179        | 0.965 |
| 47.56           | 1420->          | 9526.2        | 96.0      | 0.249        | 0.478 |

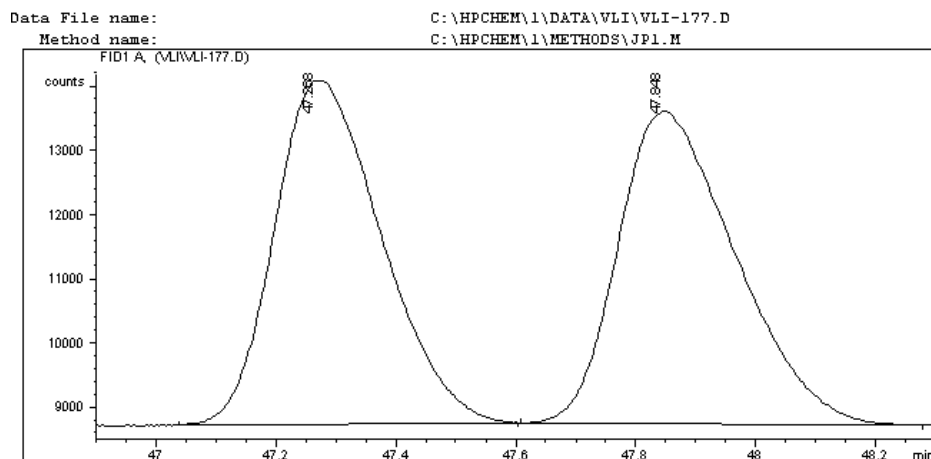

| Meas. RT<br>min | Area<br>mAU*sec | Height<br>mAU | Area<br>% | Width<br>min | Symm. |
|-----------------|-----------------|---------------|-----------|--------------|-------|
| 47.27           | 6631->          | 5351.2        | 50.1      | 0.207        | 0.657 |
| 47.85           | 6610->          | 4883.8        | 49.9      | 0.226        | 0.647 |

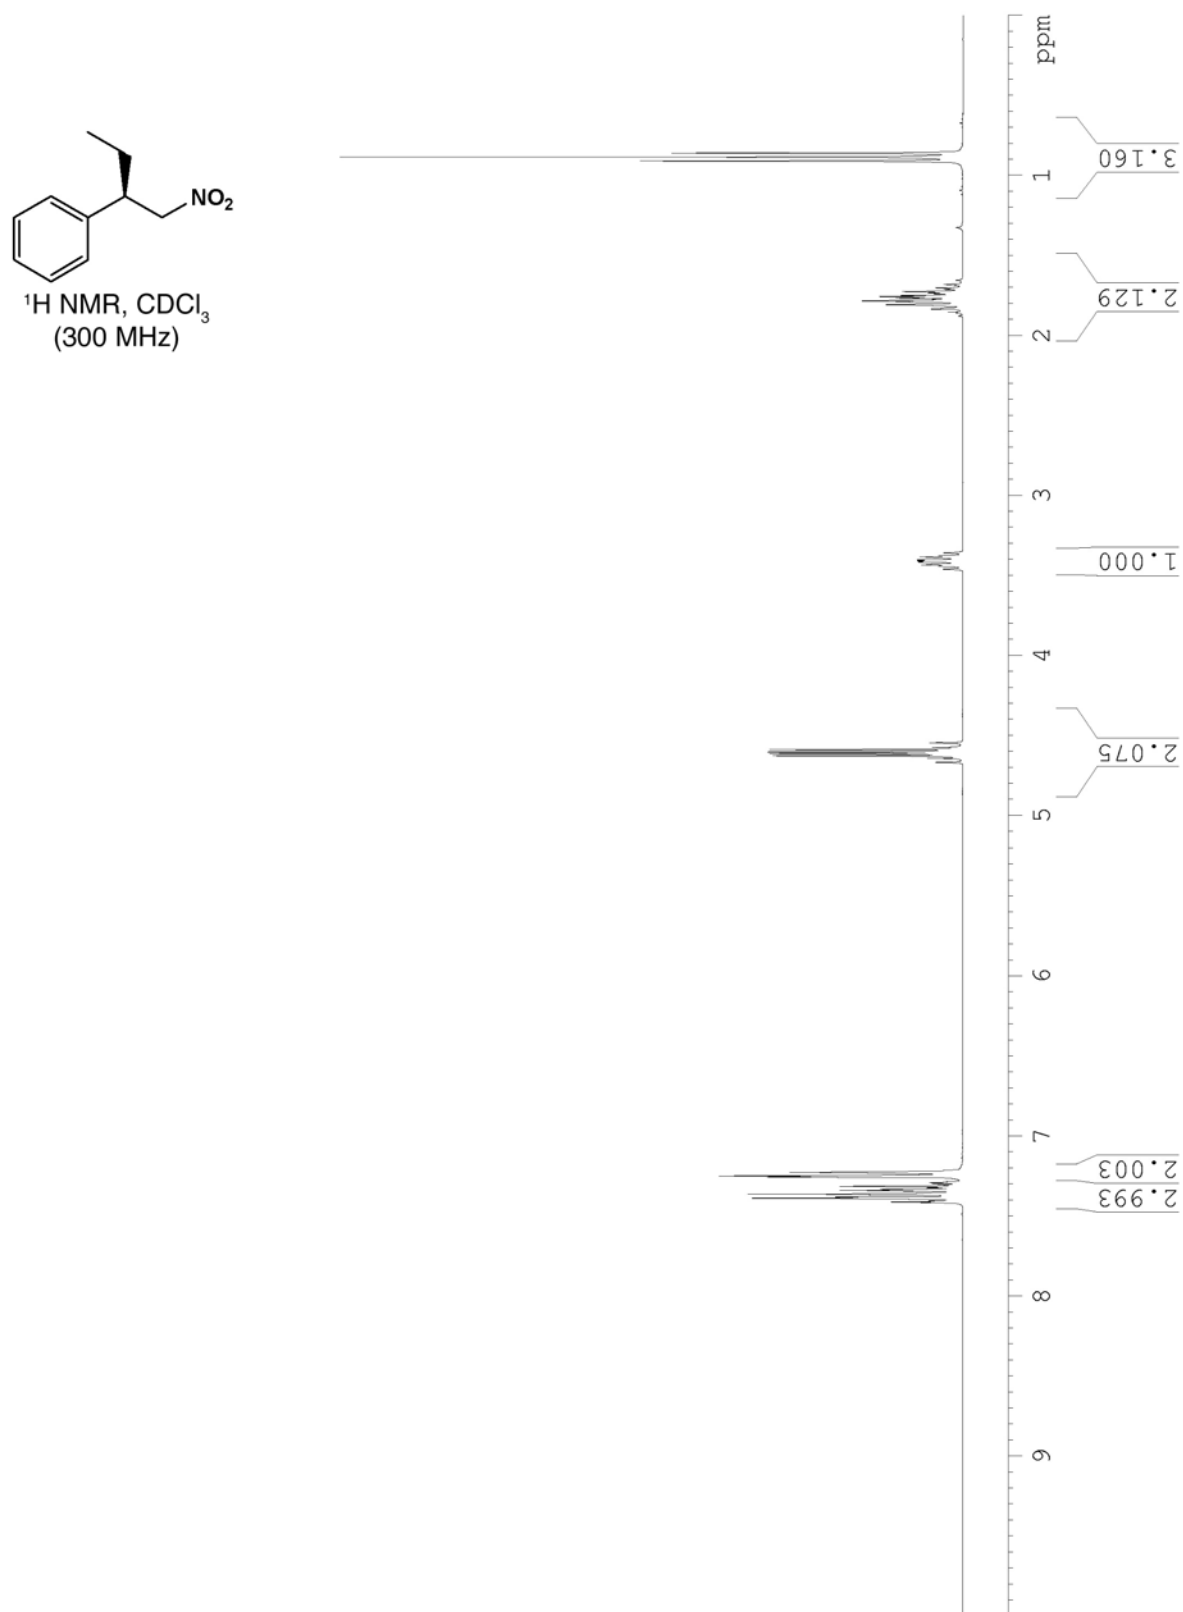

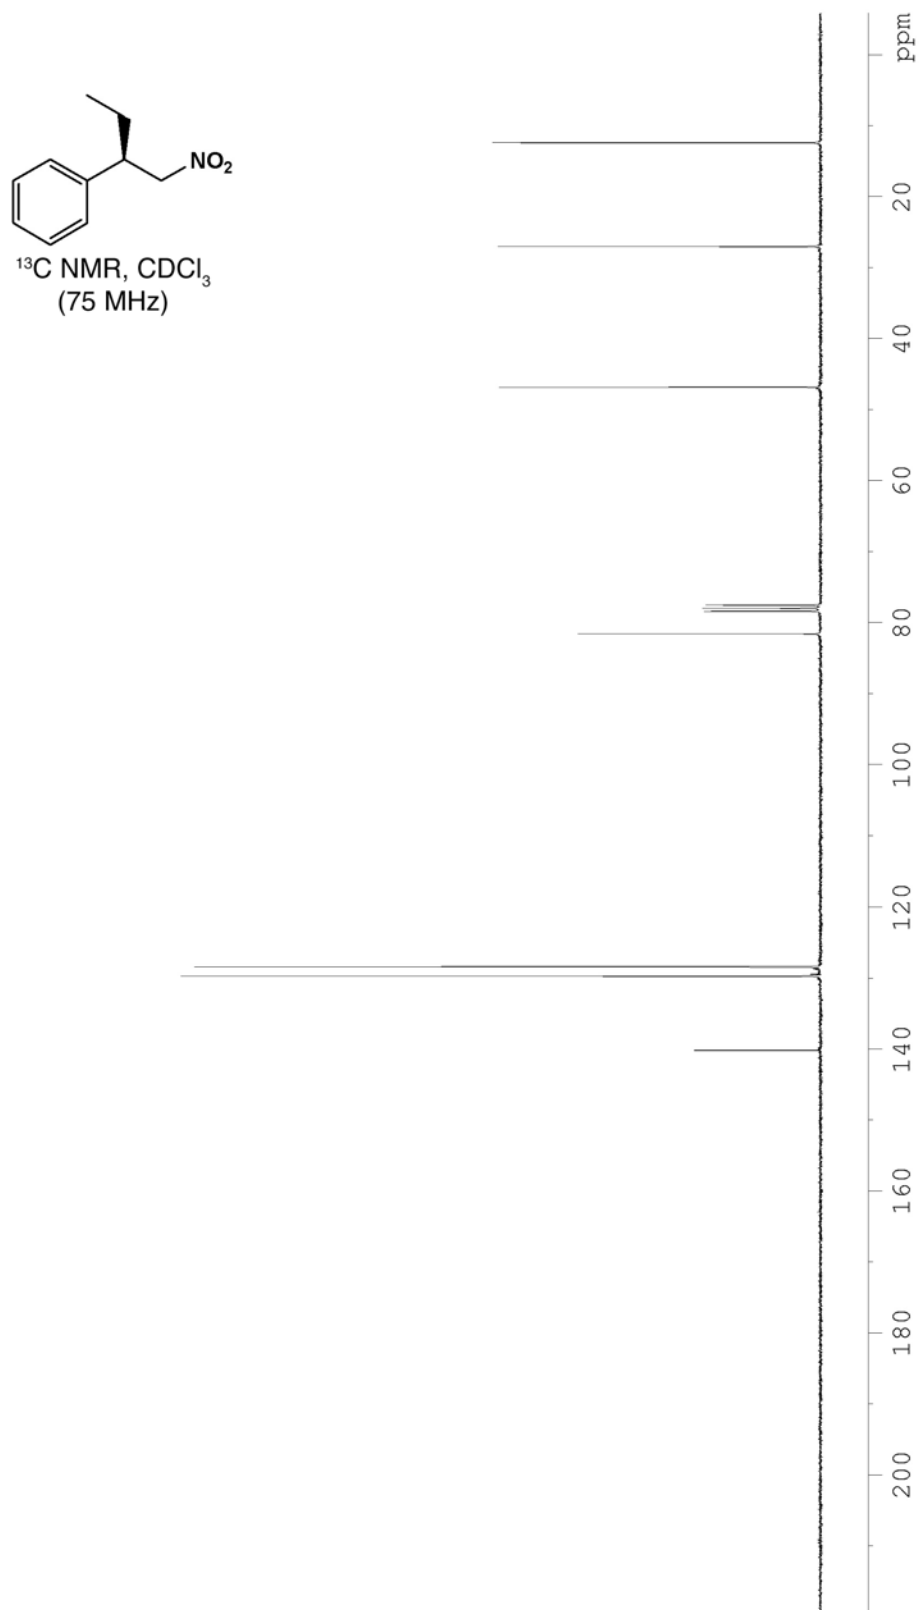

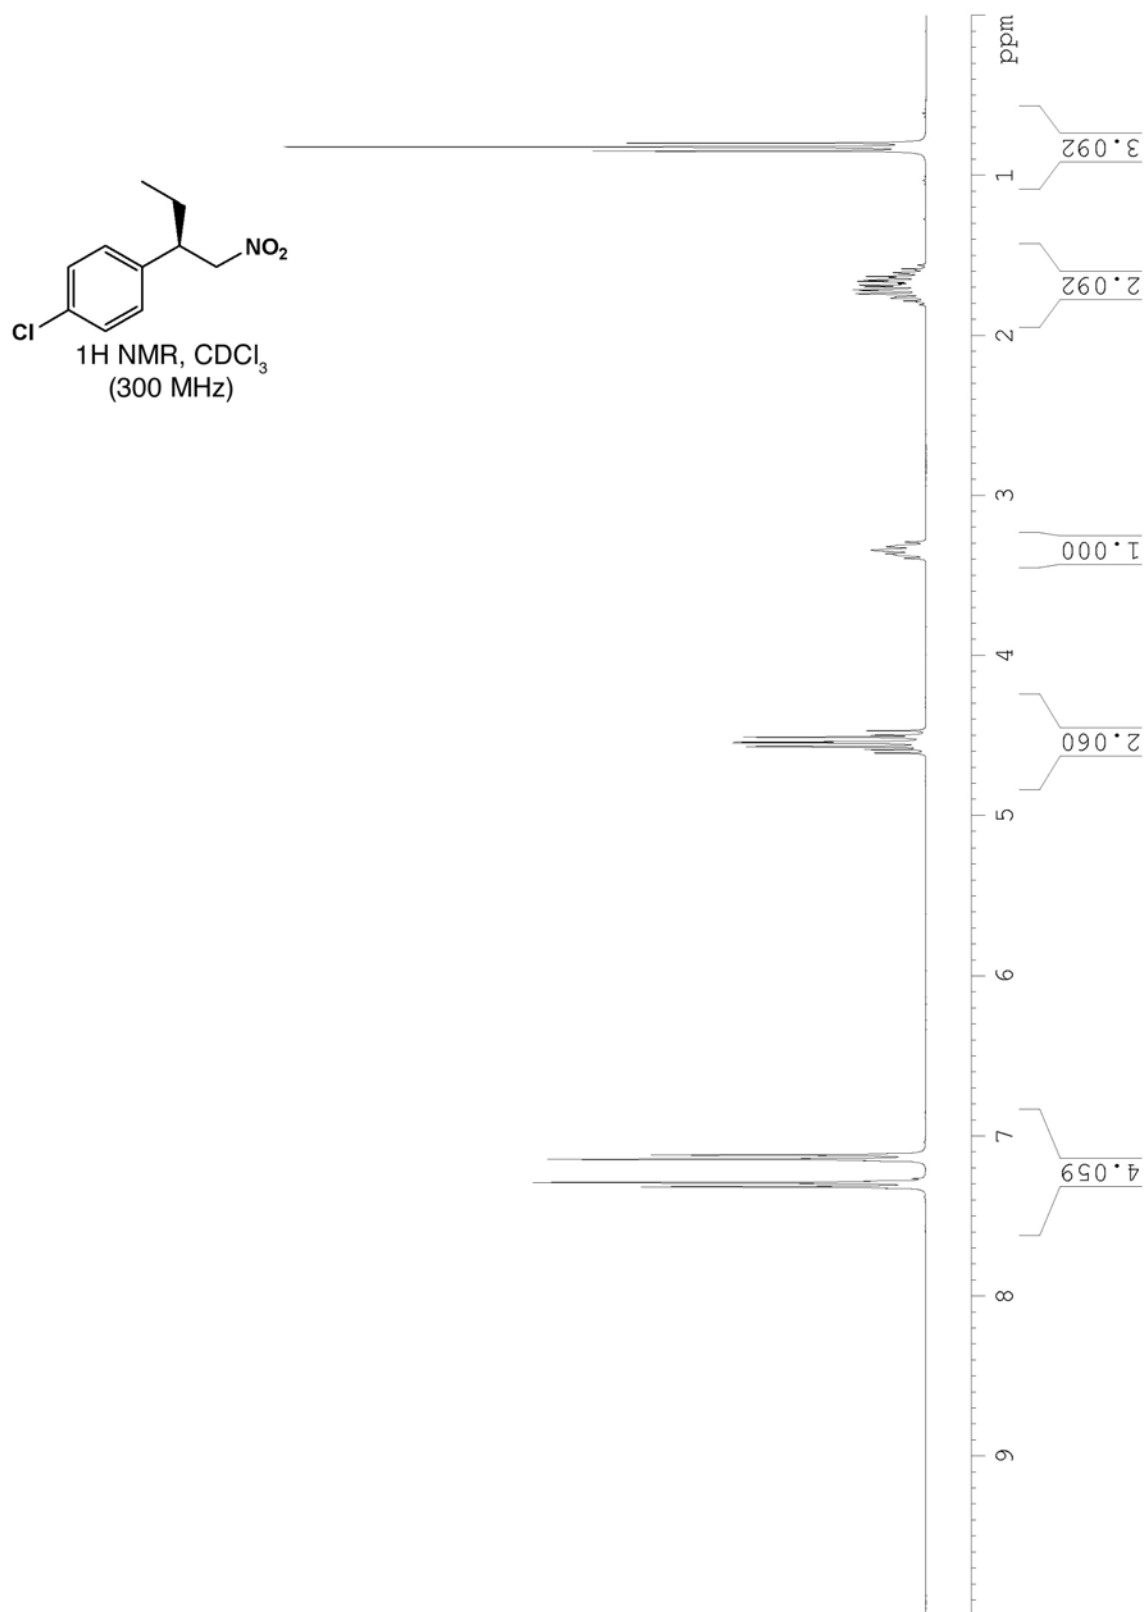

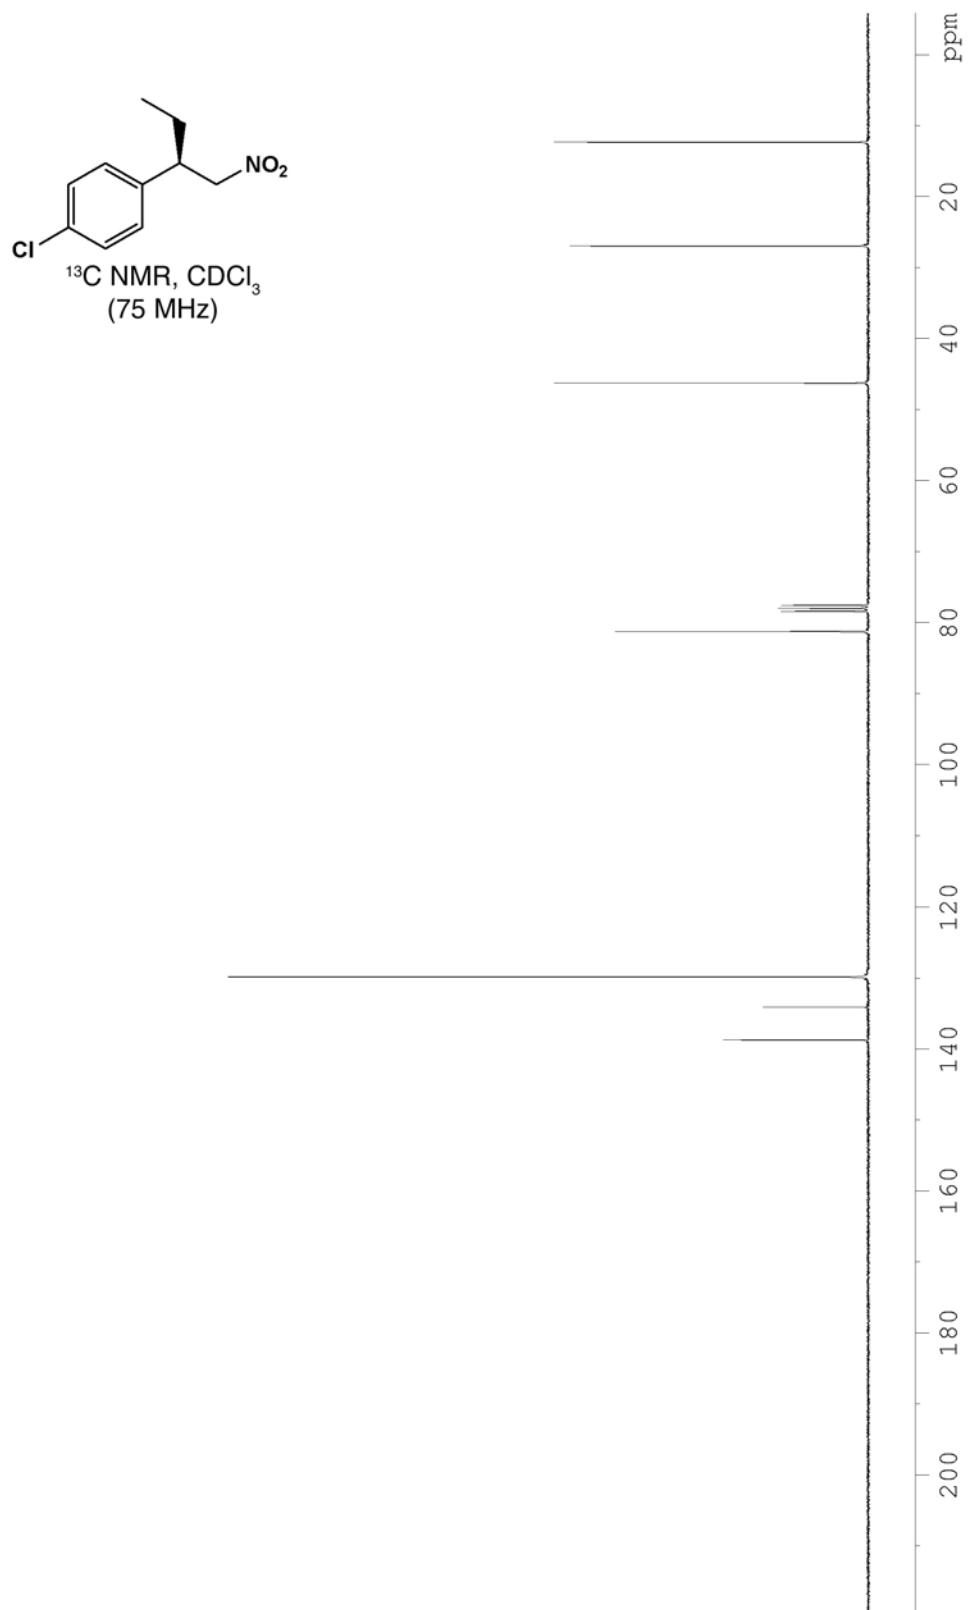

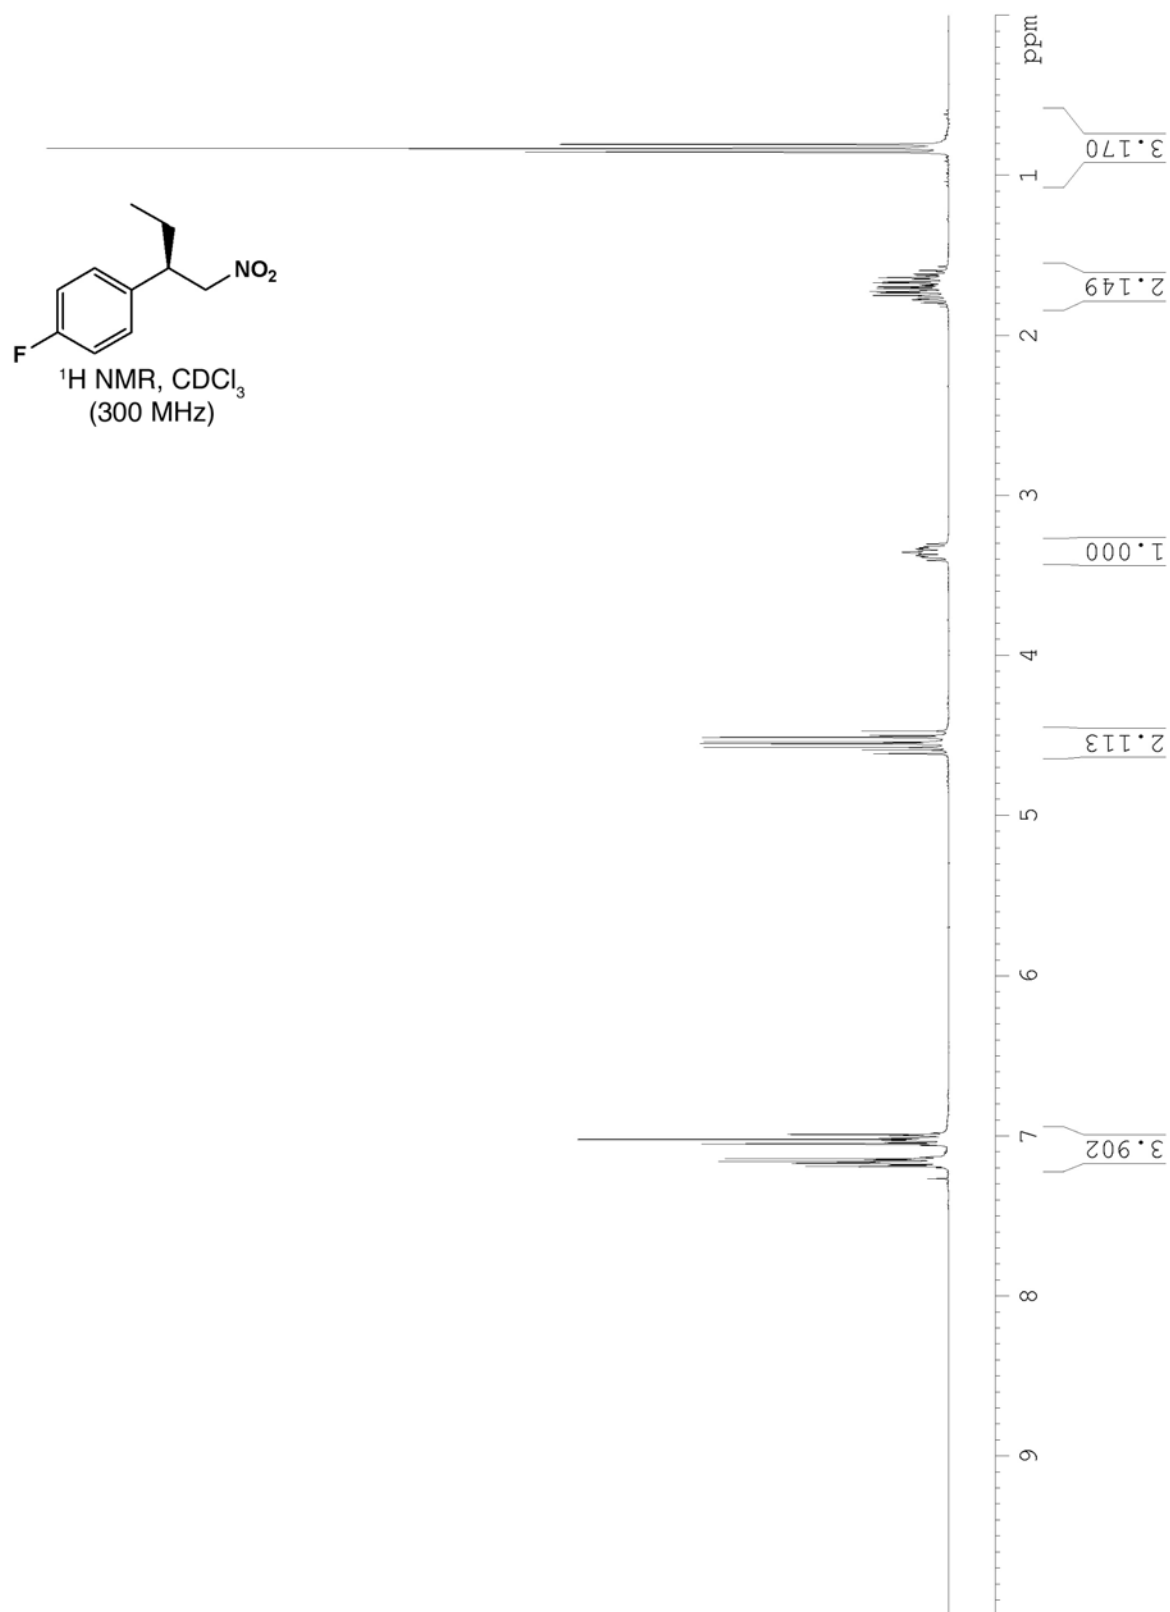

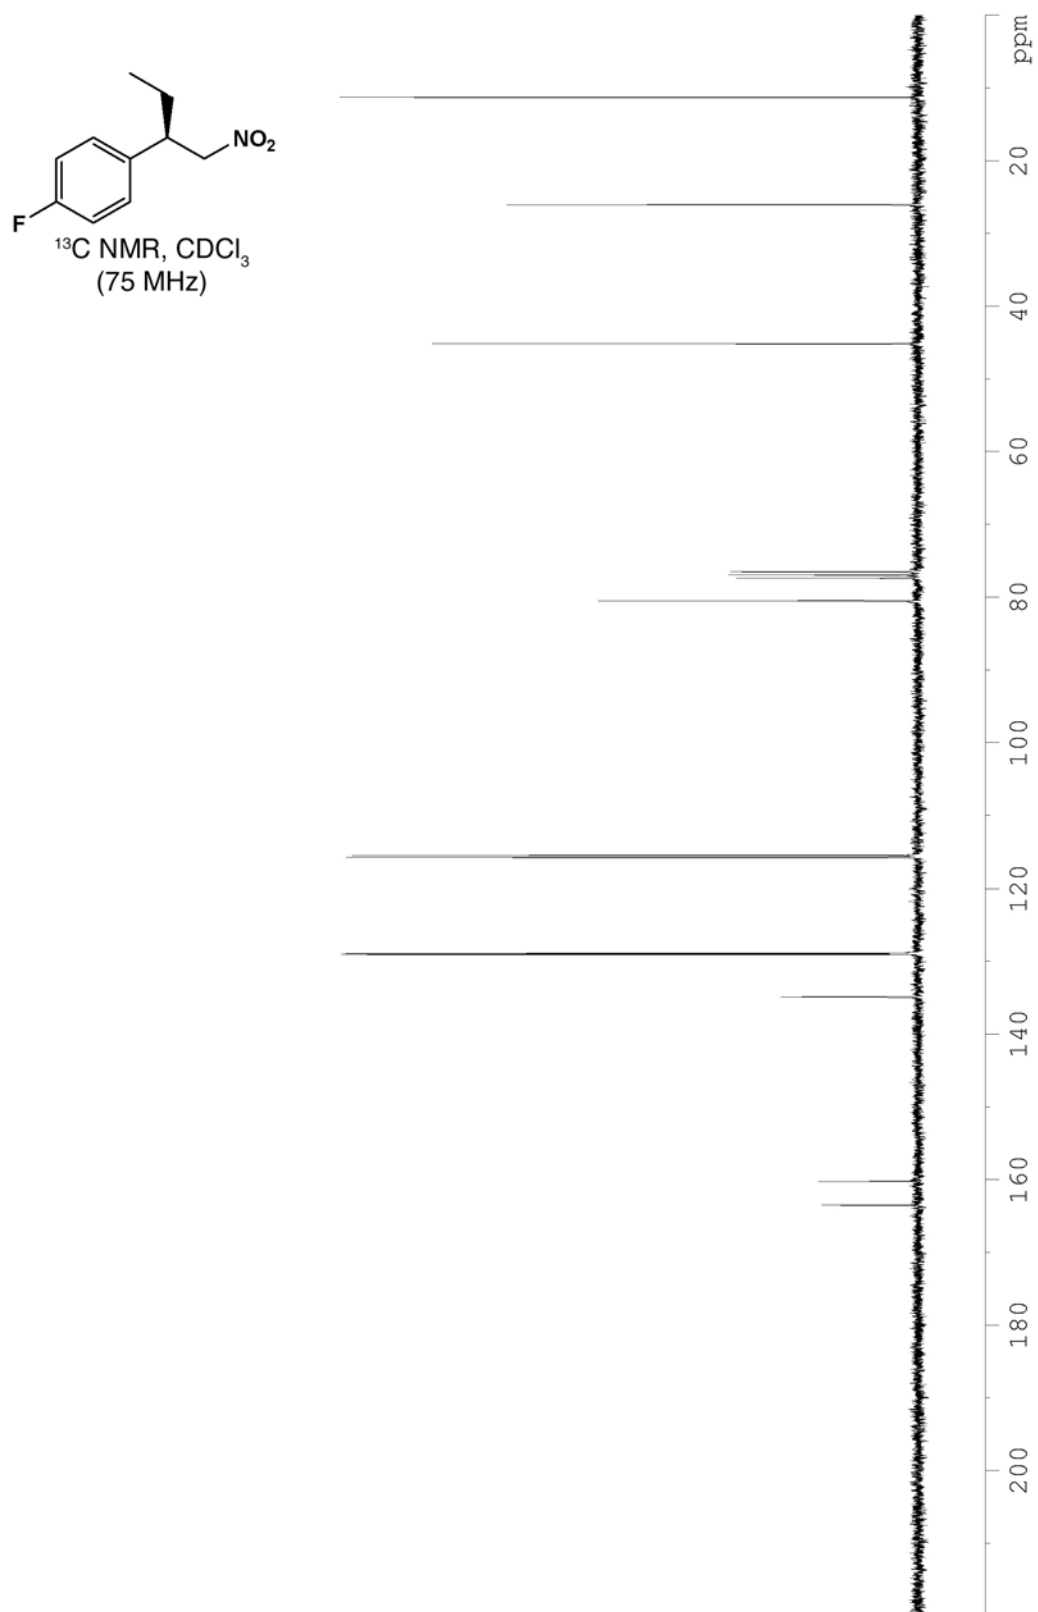

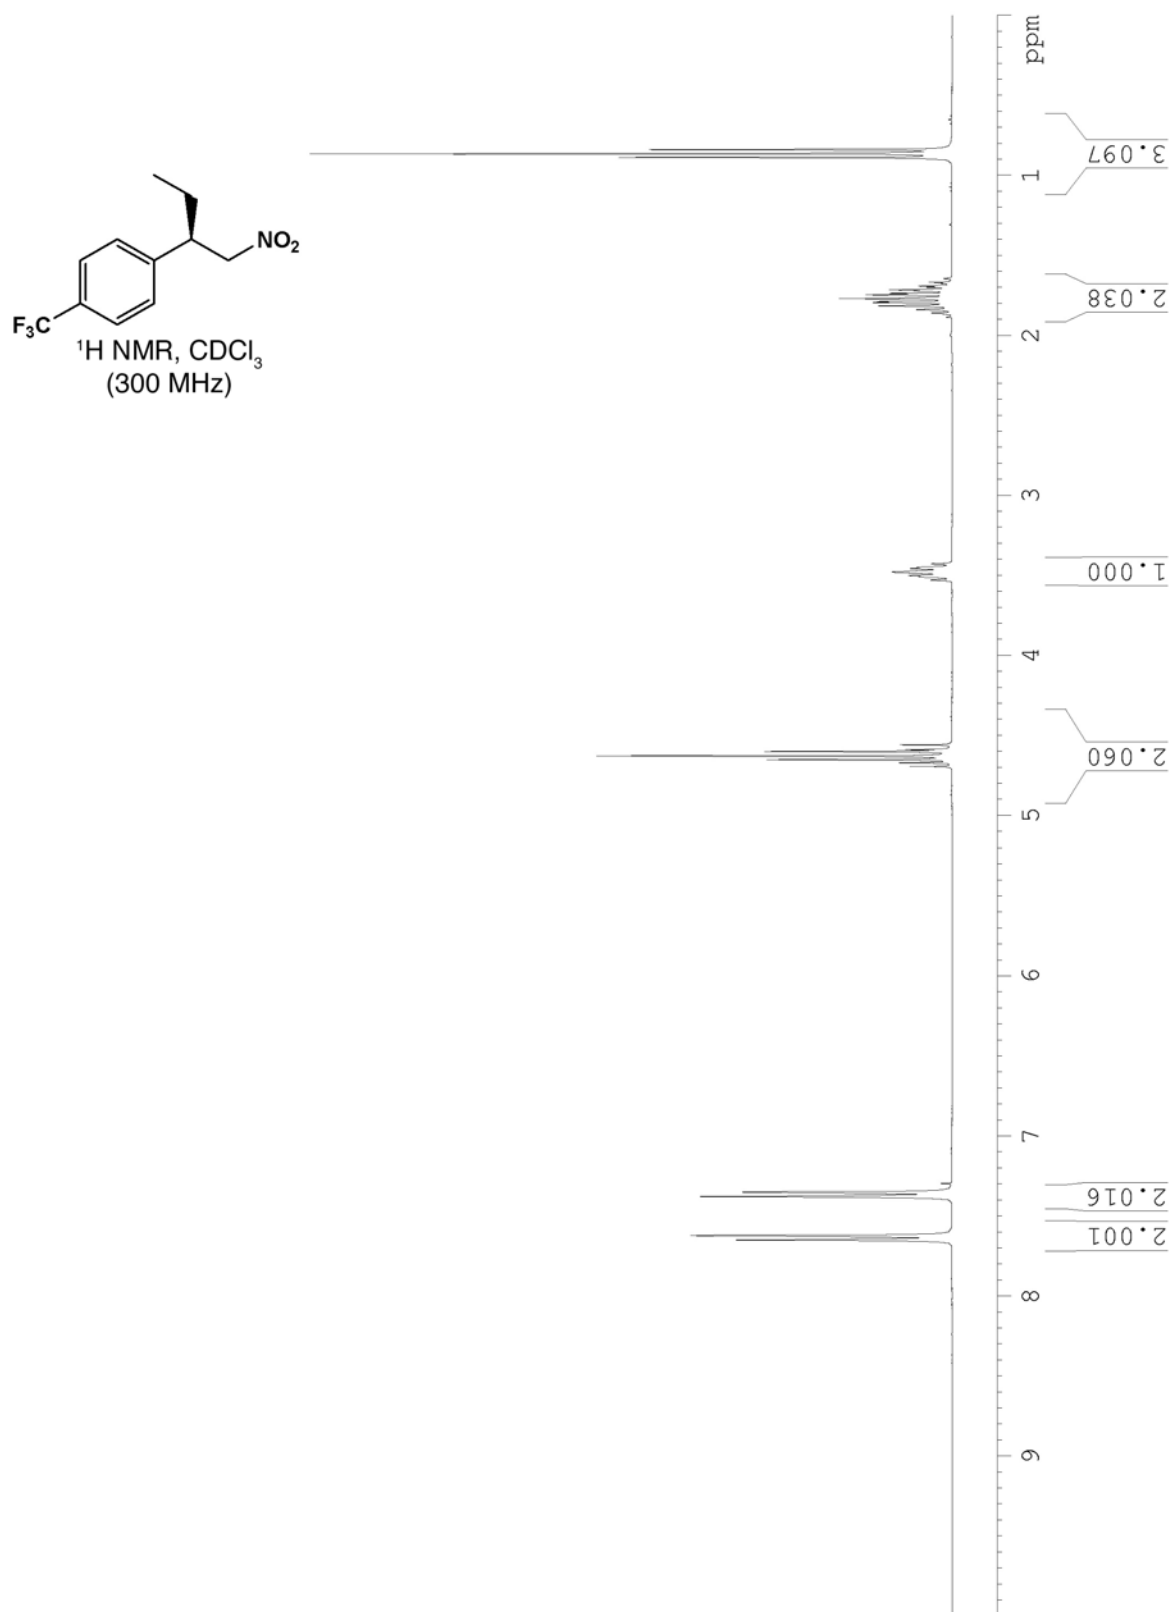



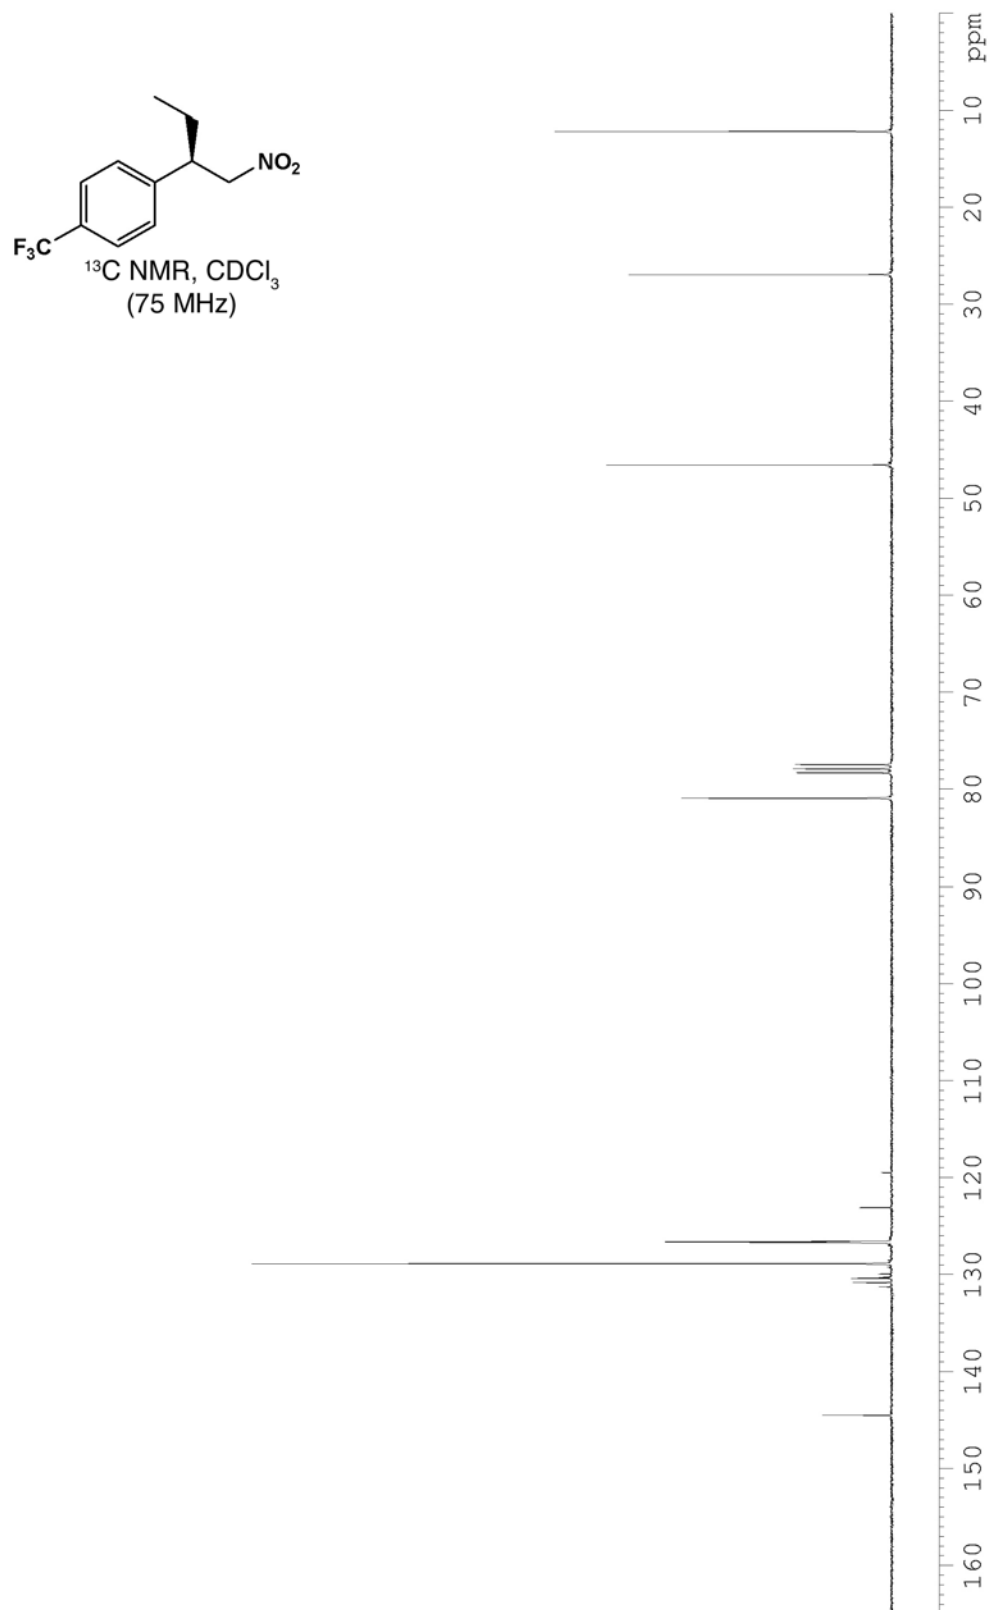

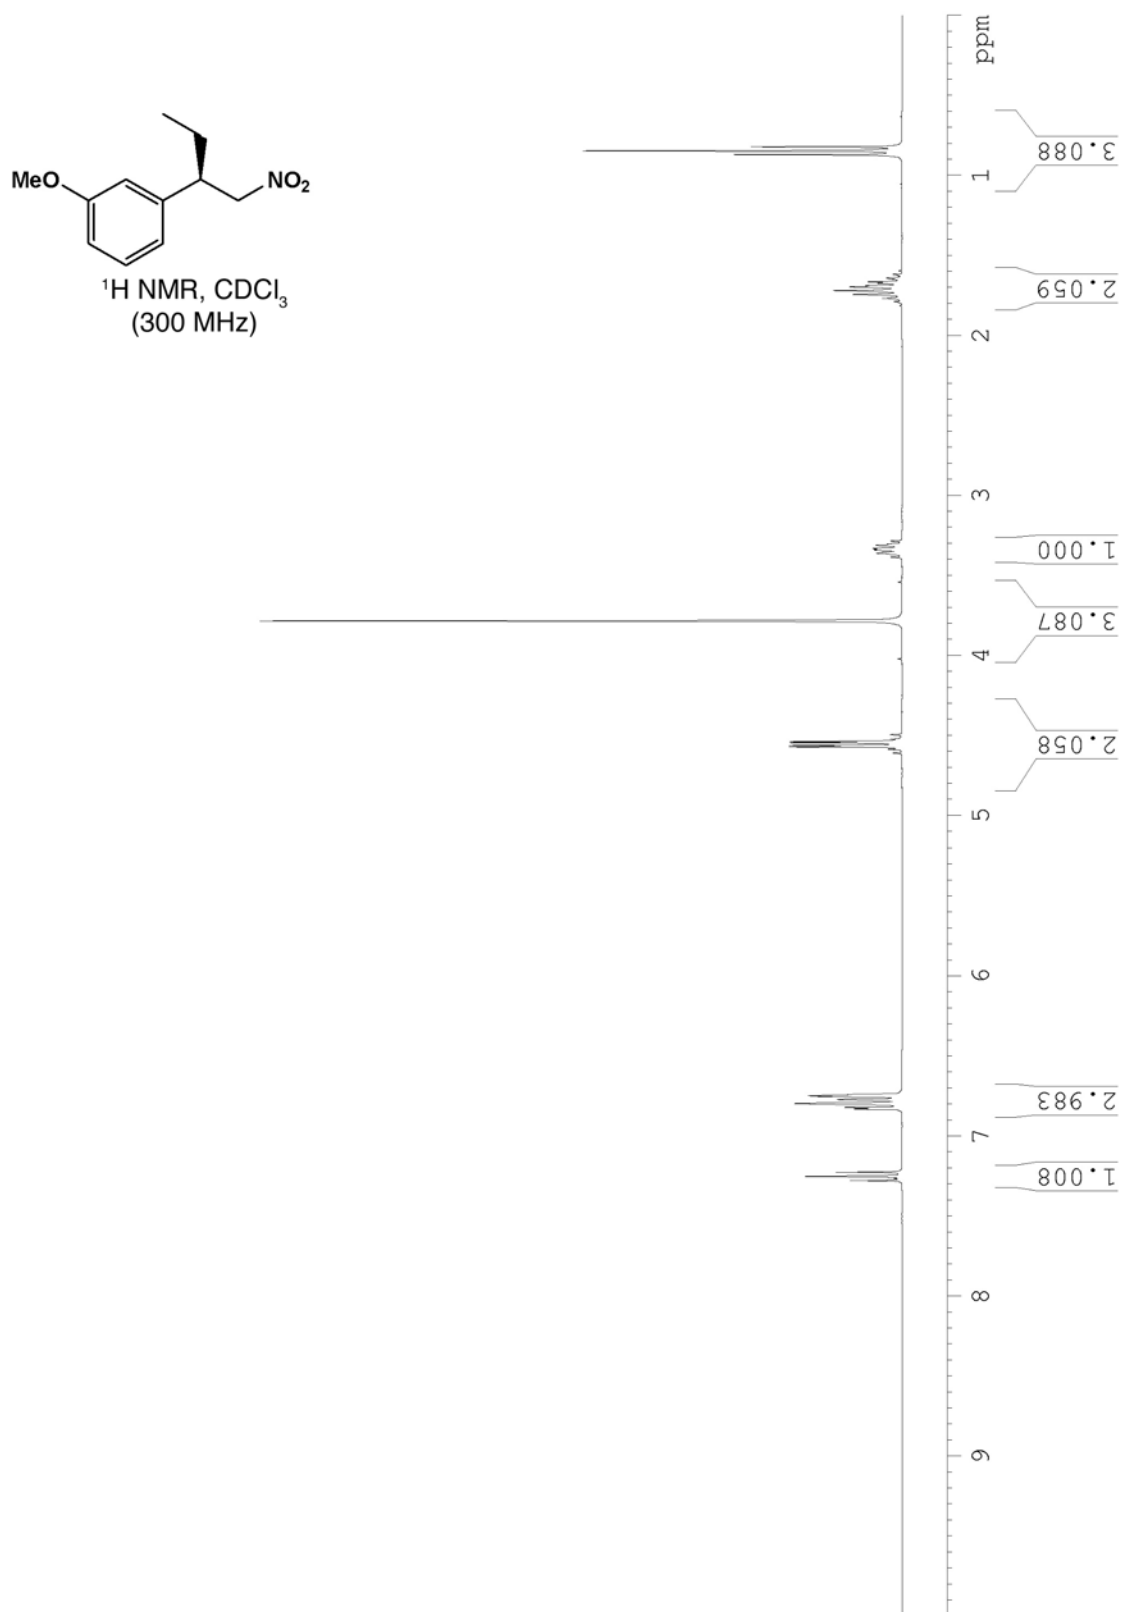

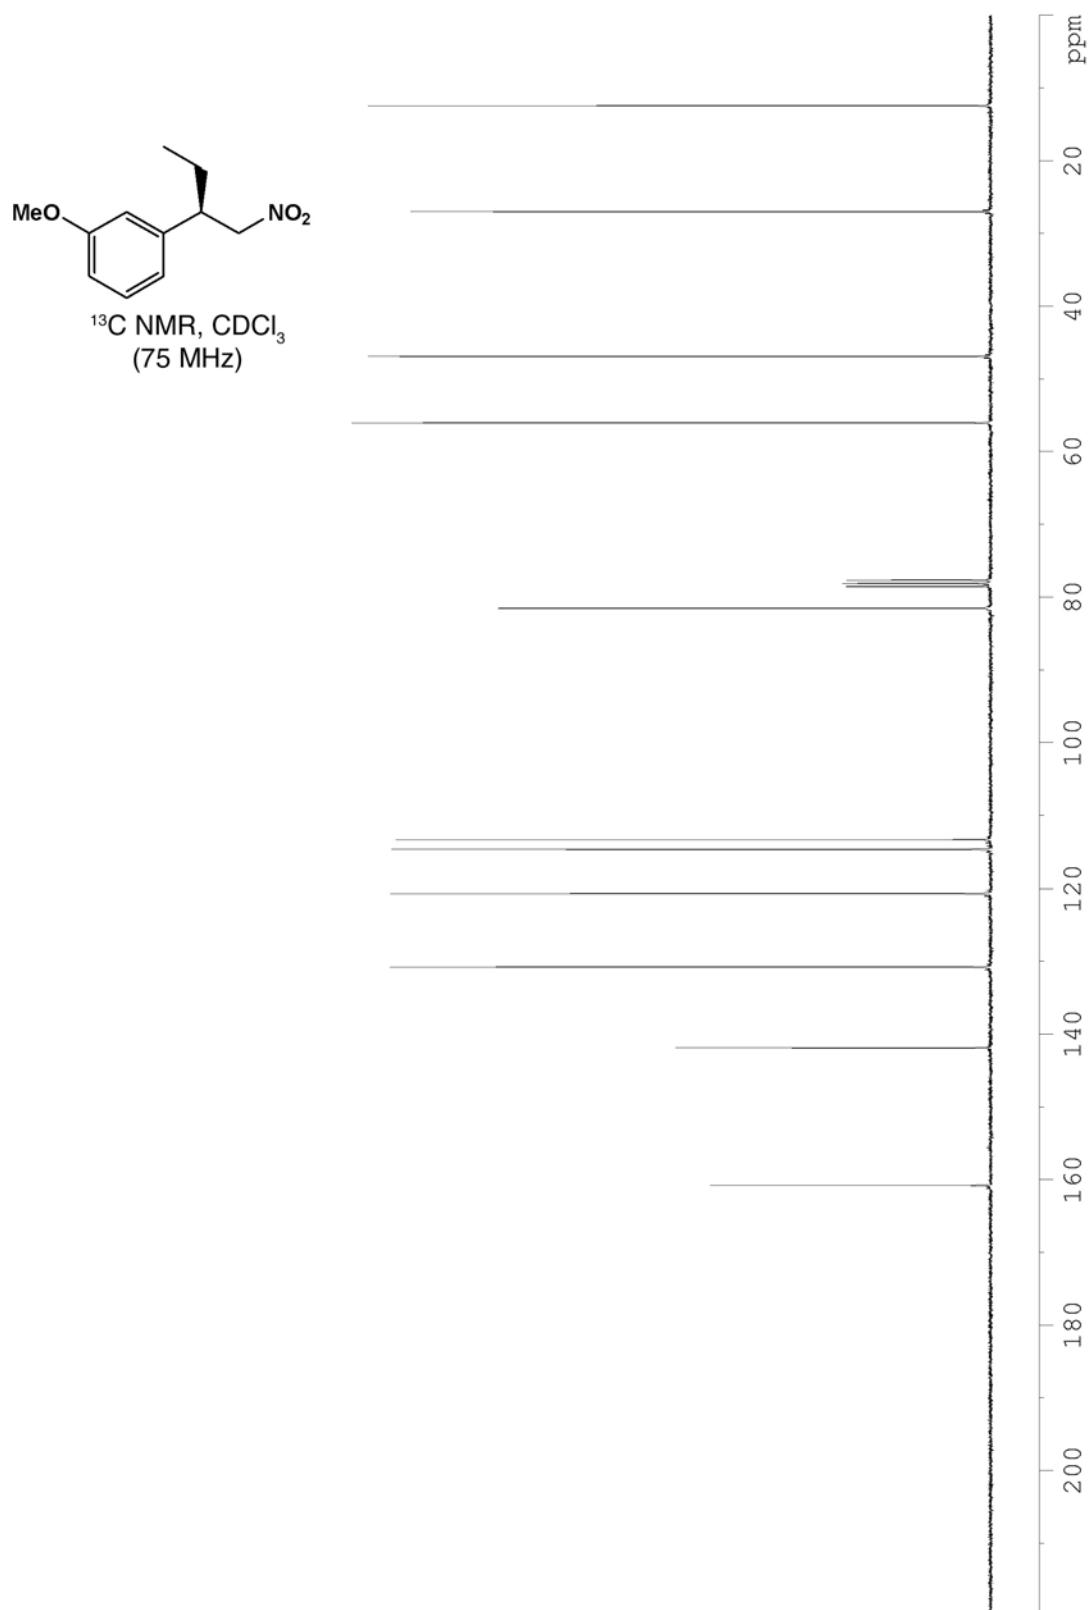

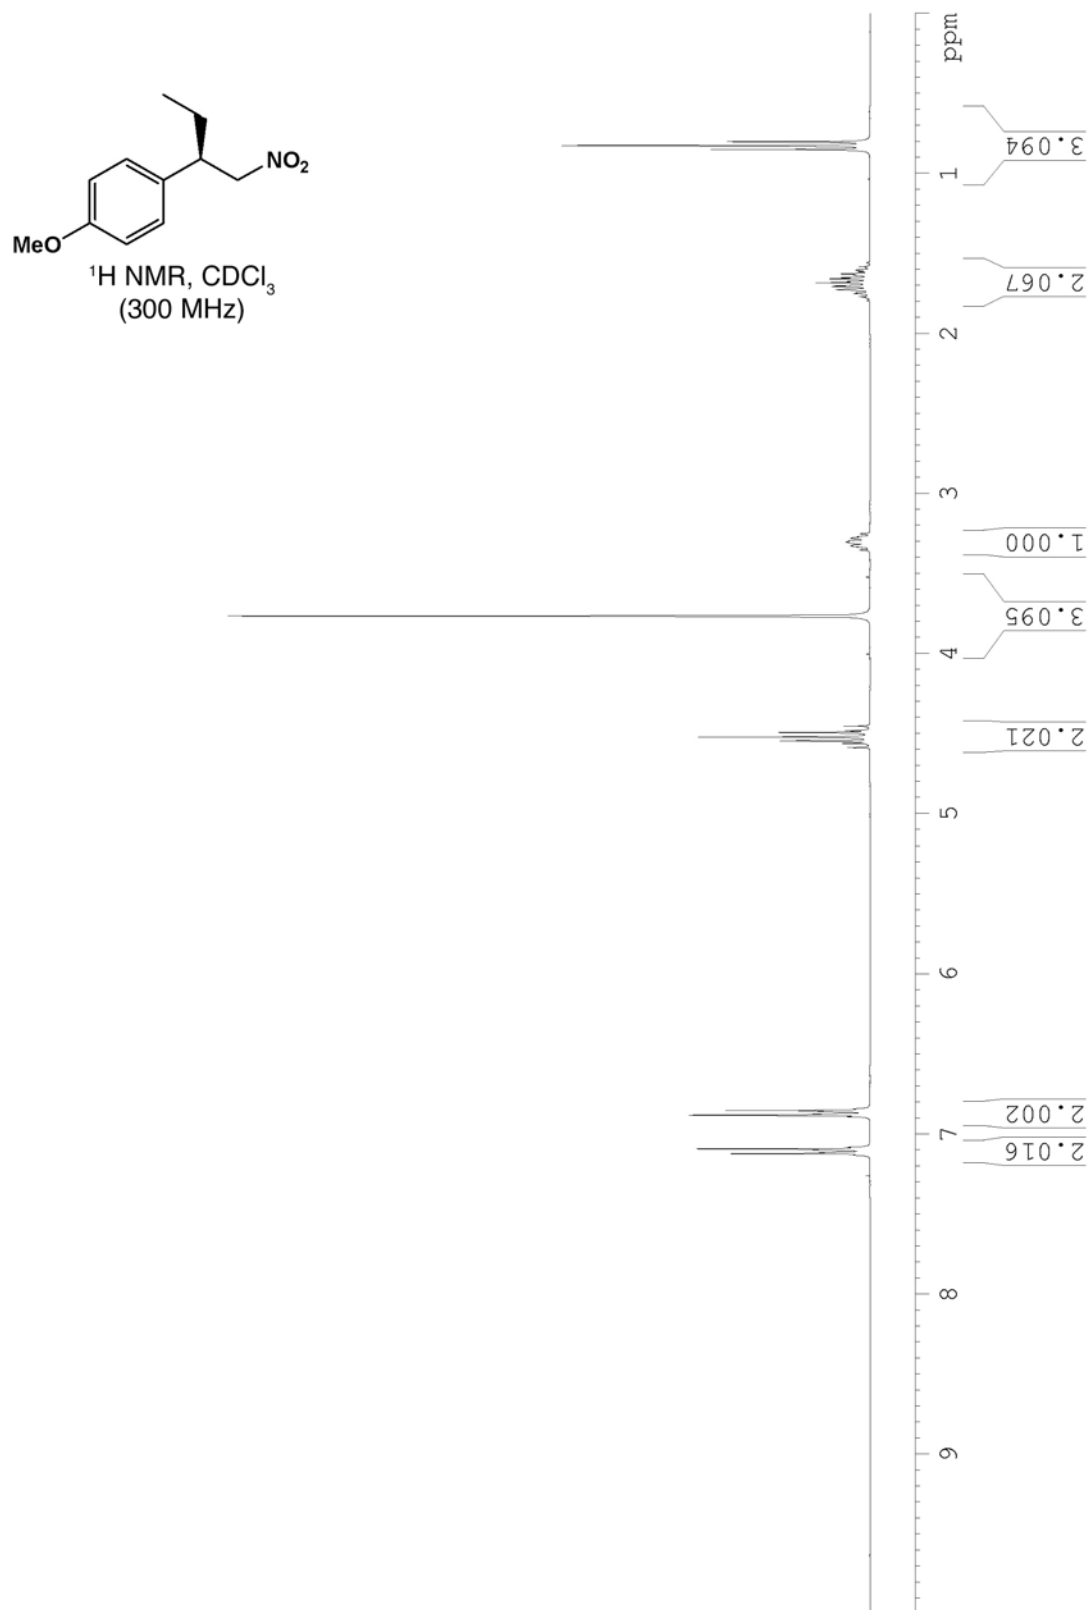

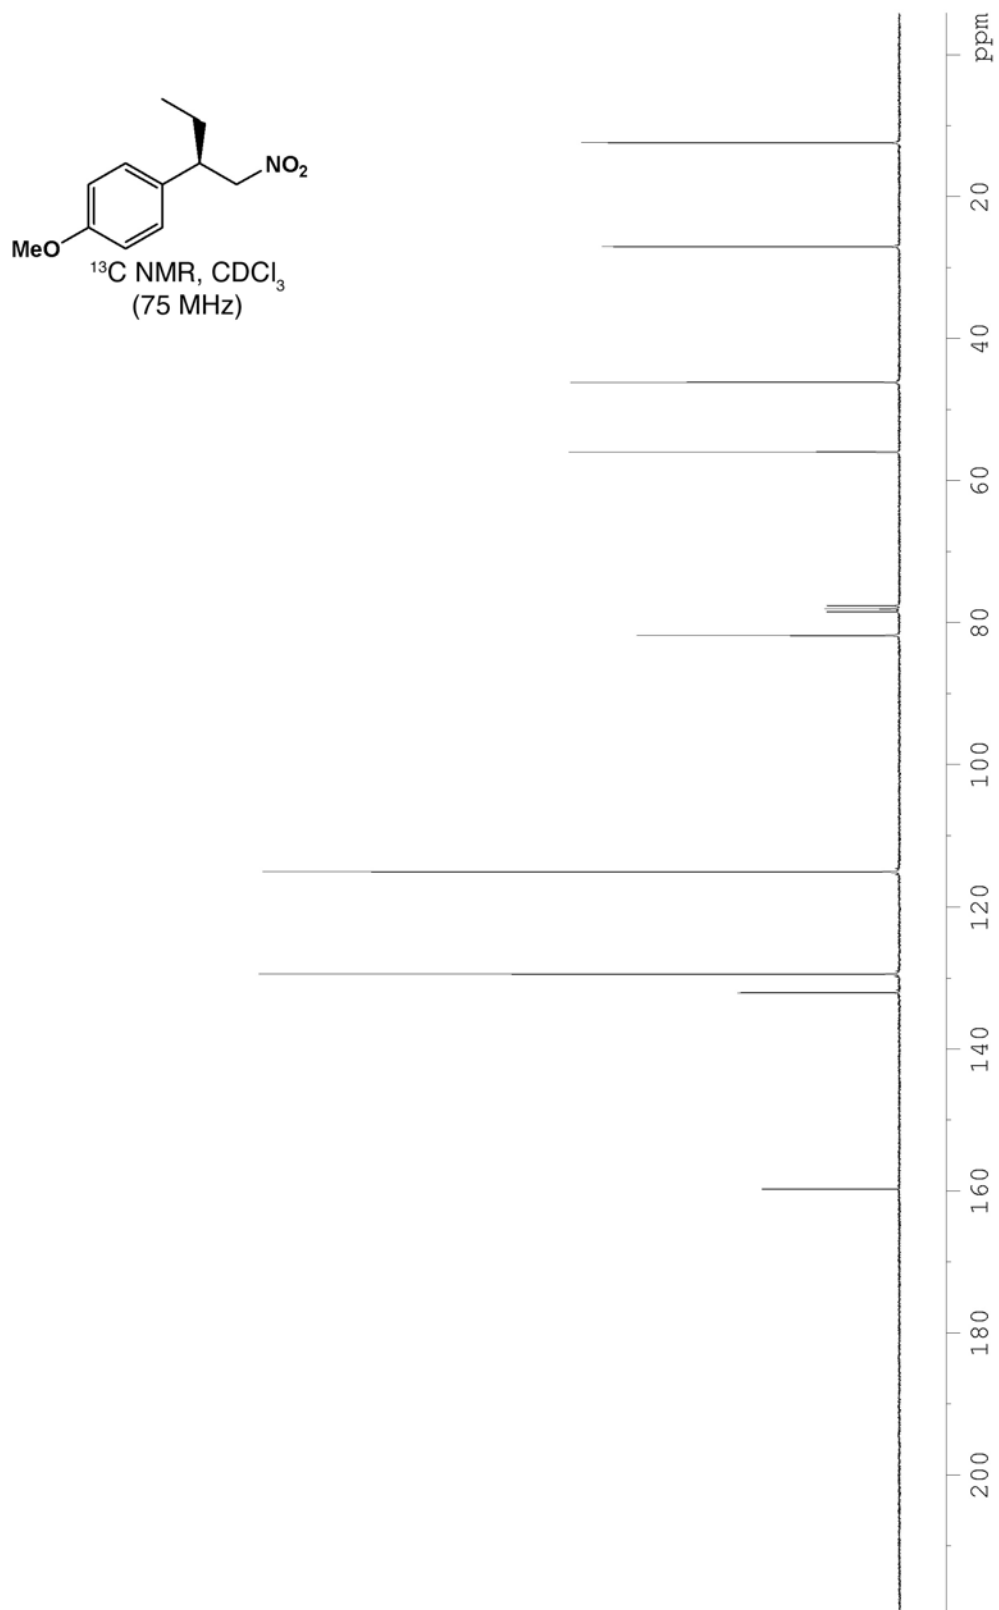

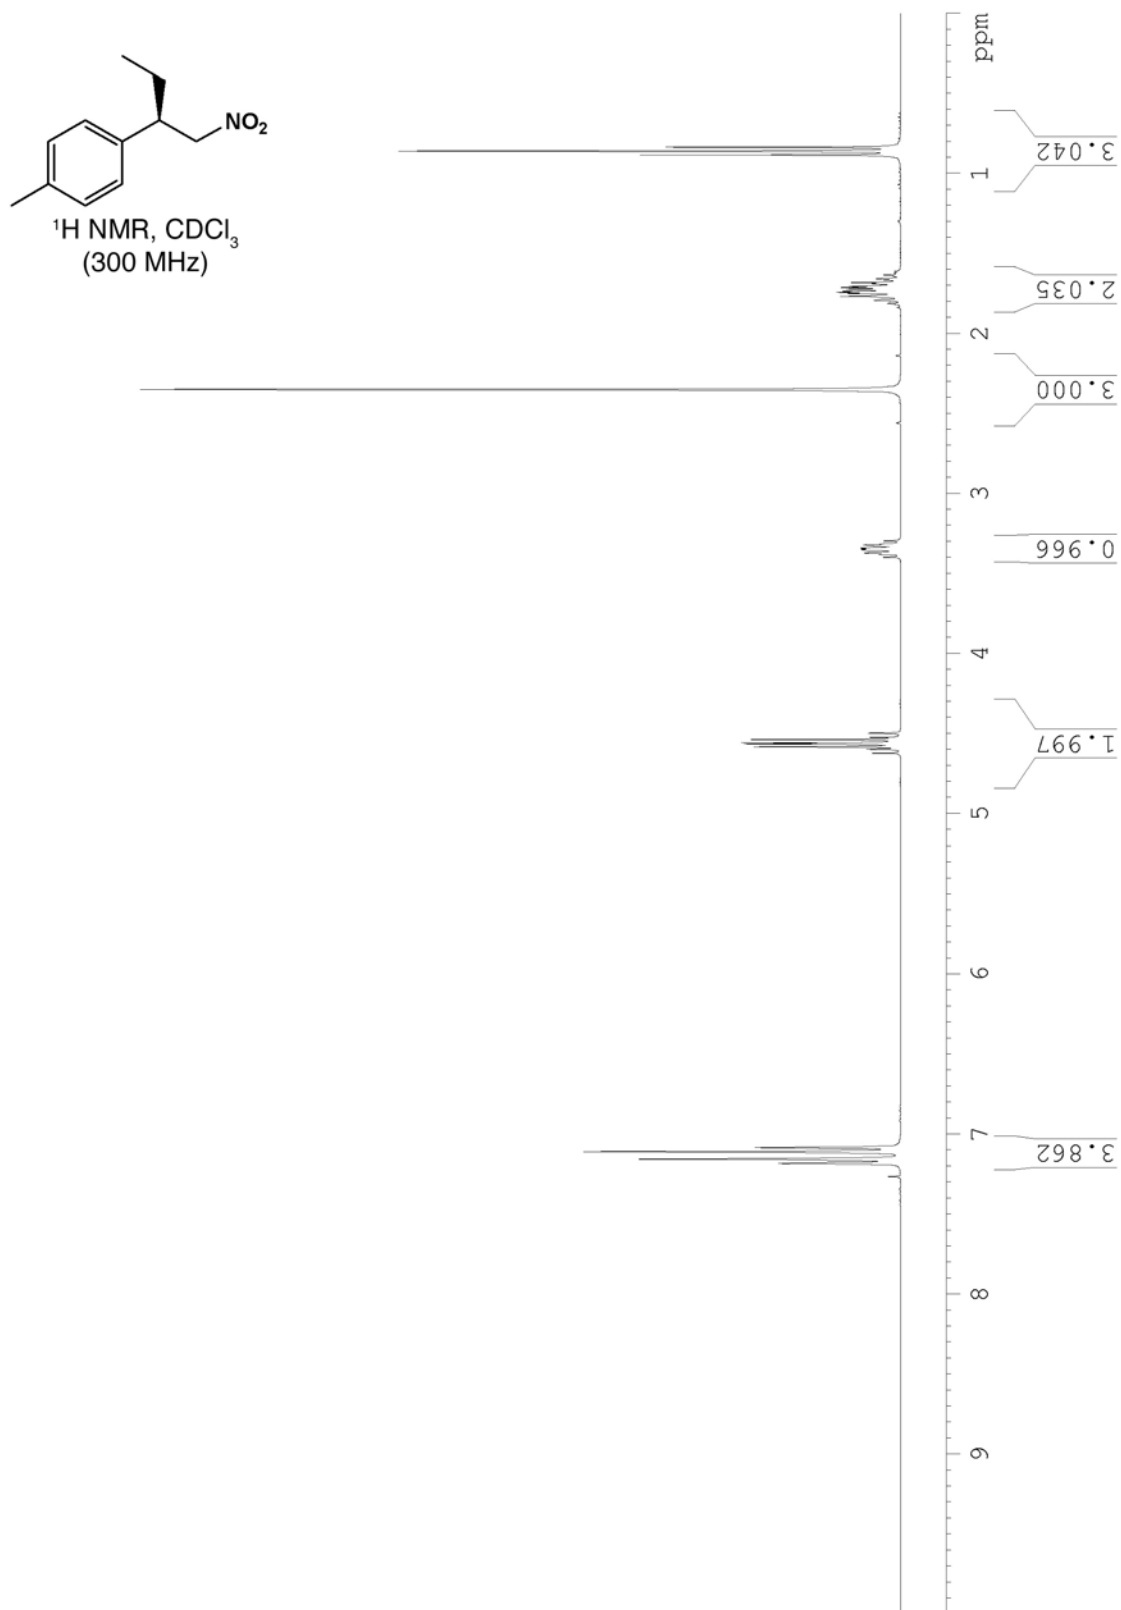

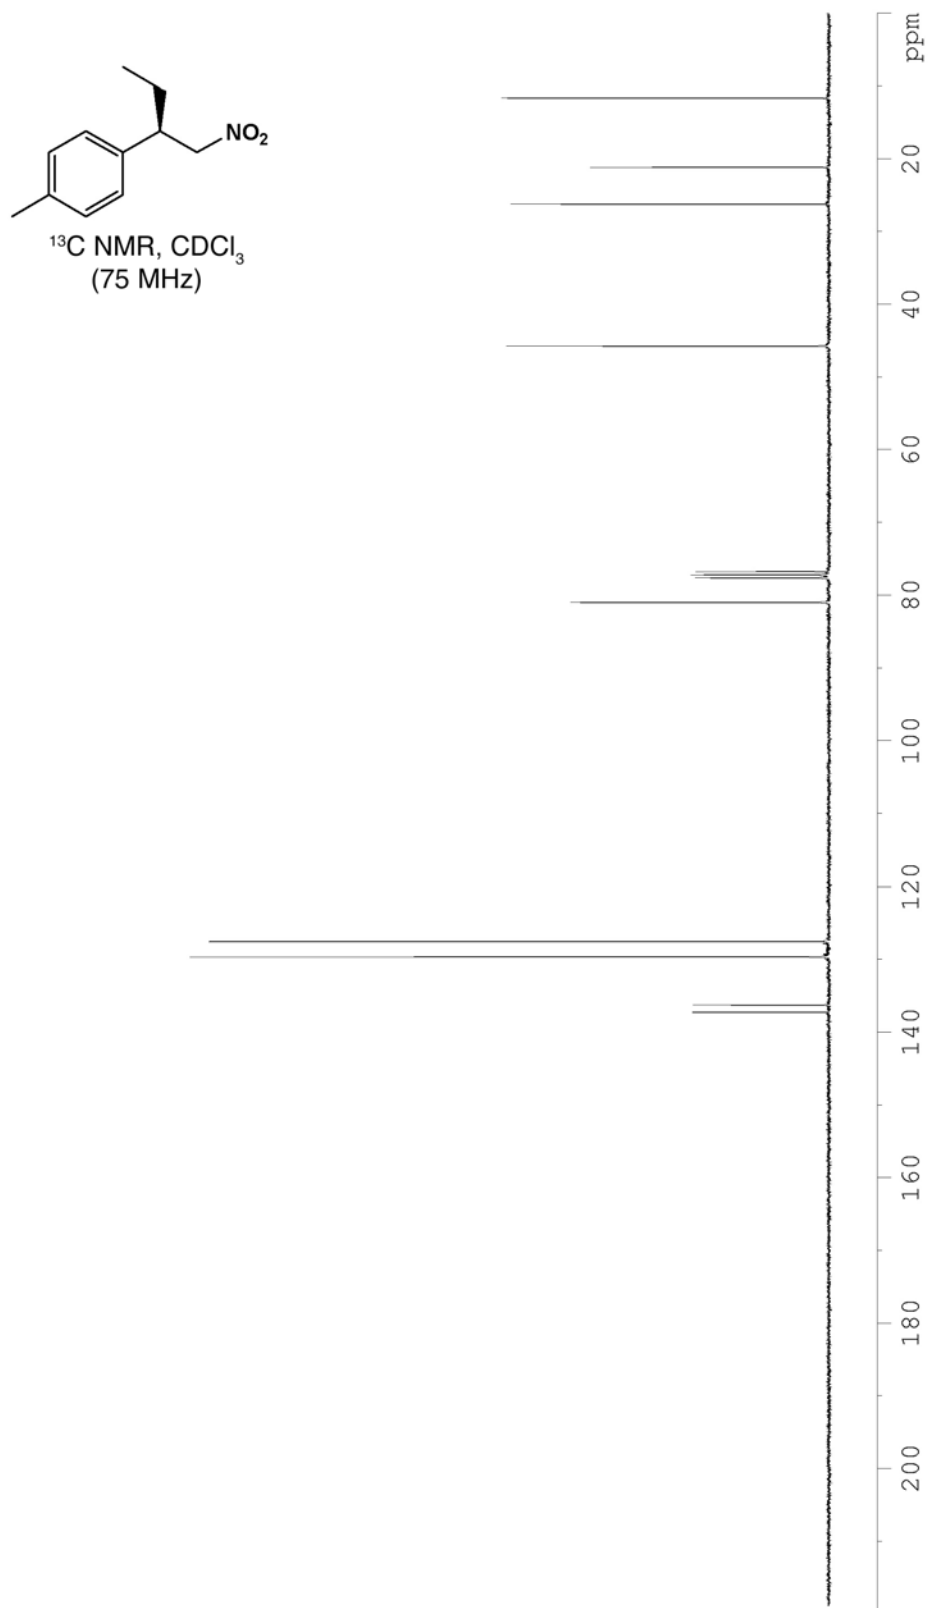

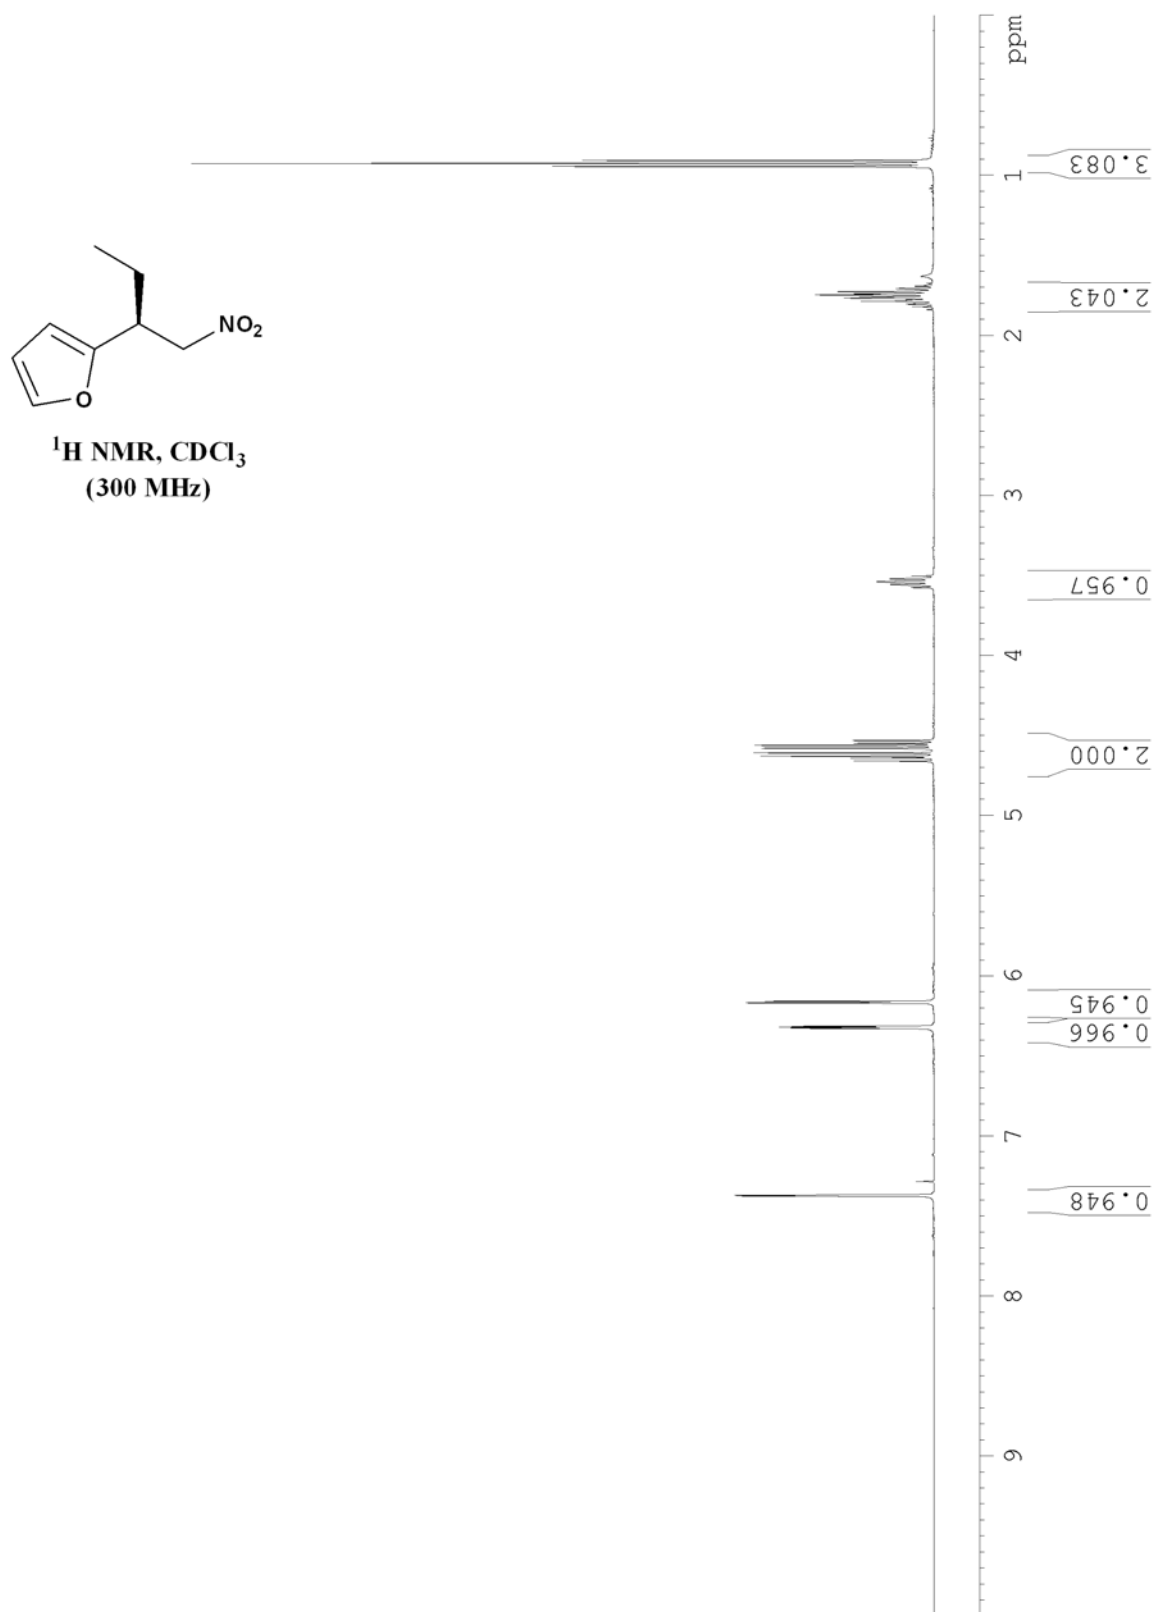



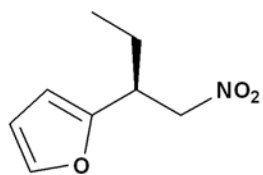

$^{13}\text{C}$  NMR,  $\text{CDCl}_3$   
(75 MHz)

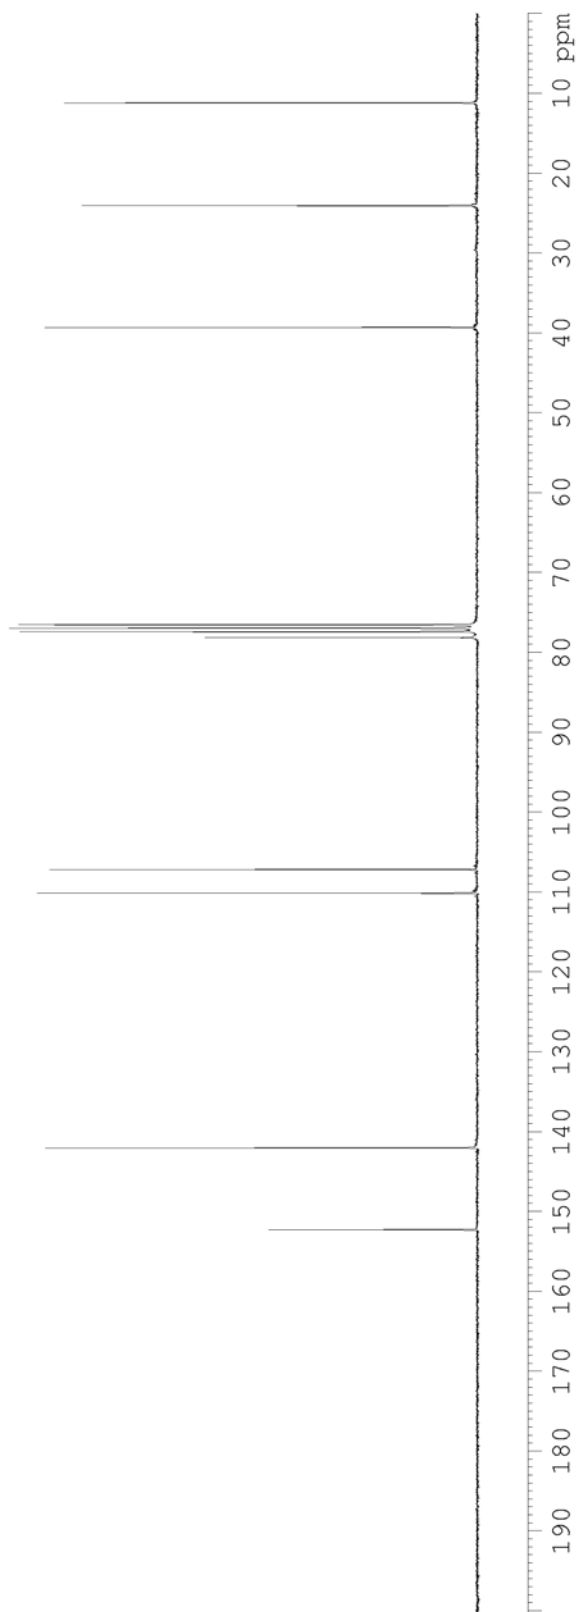

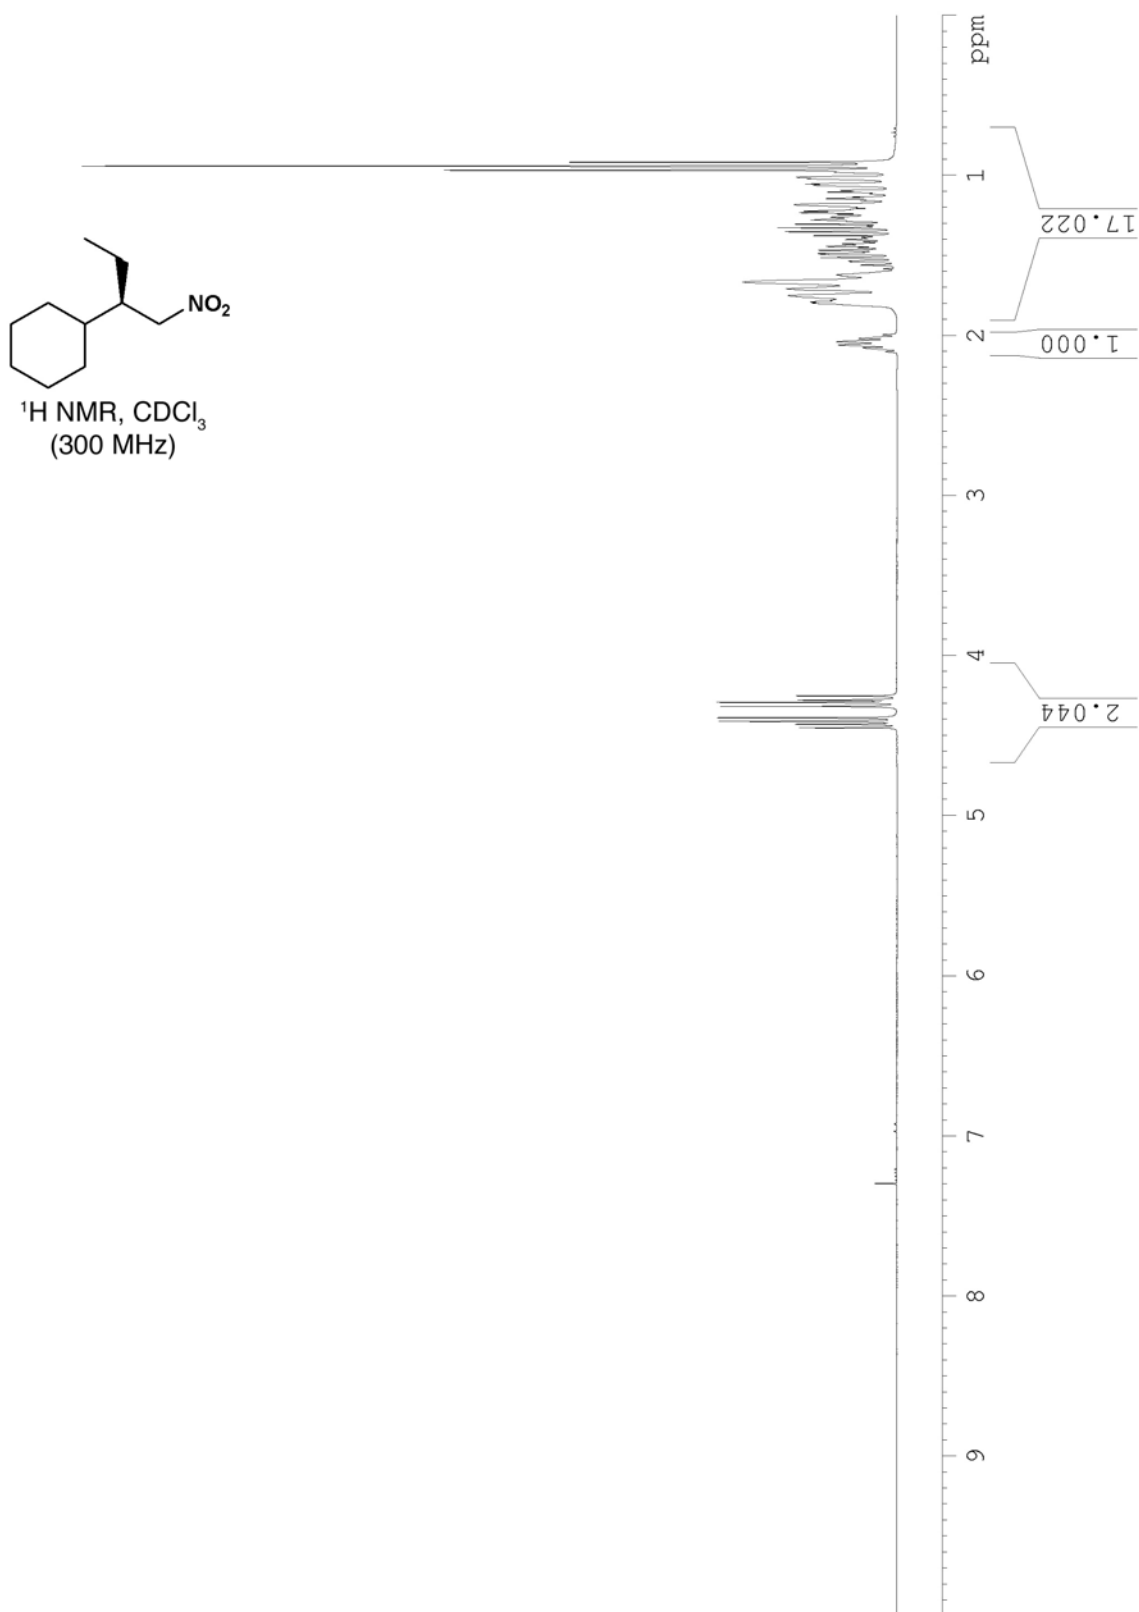

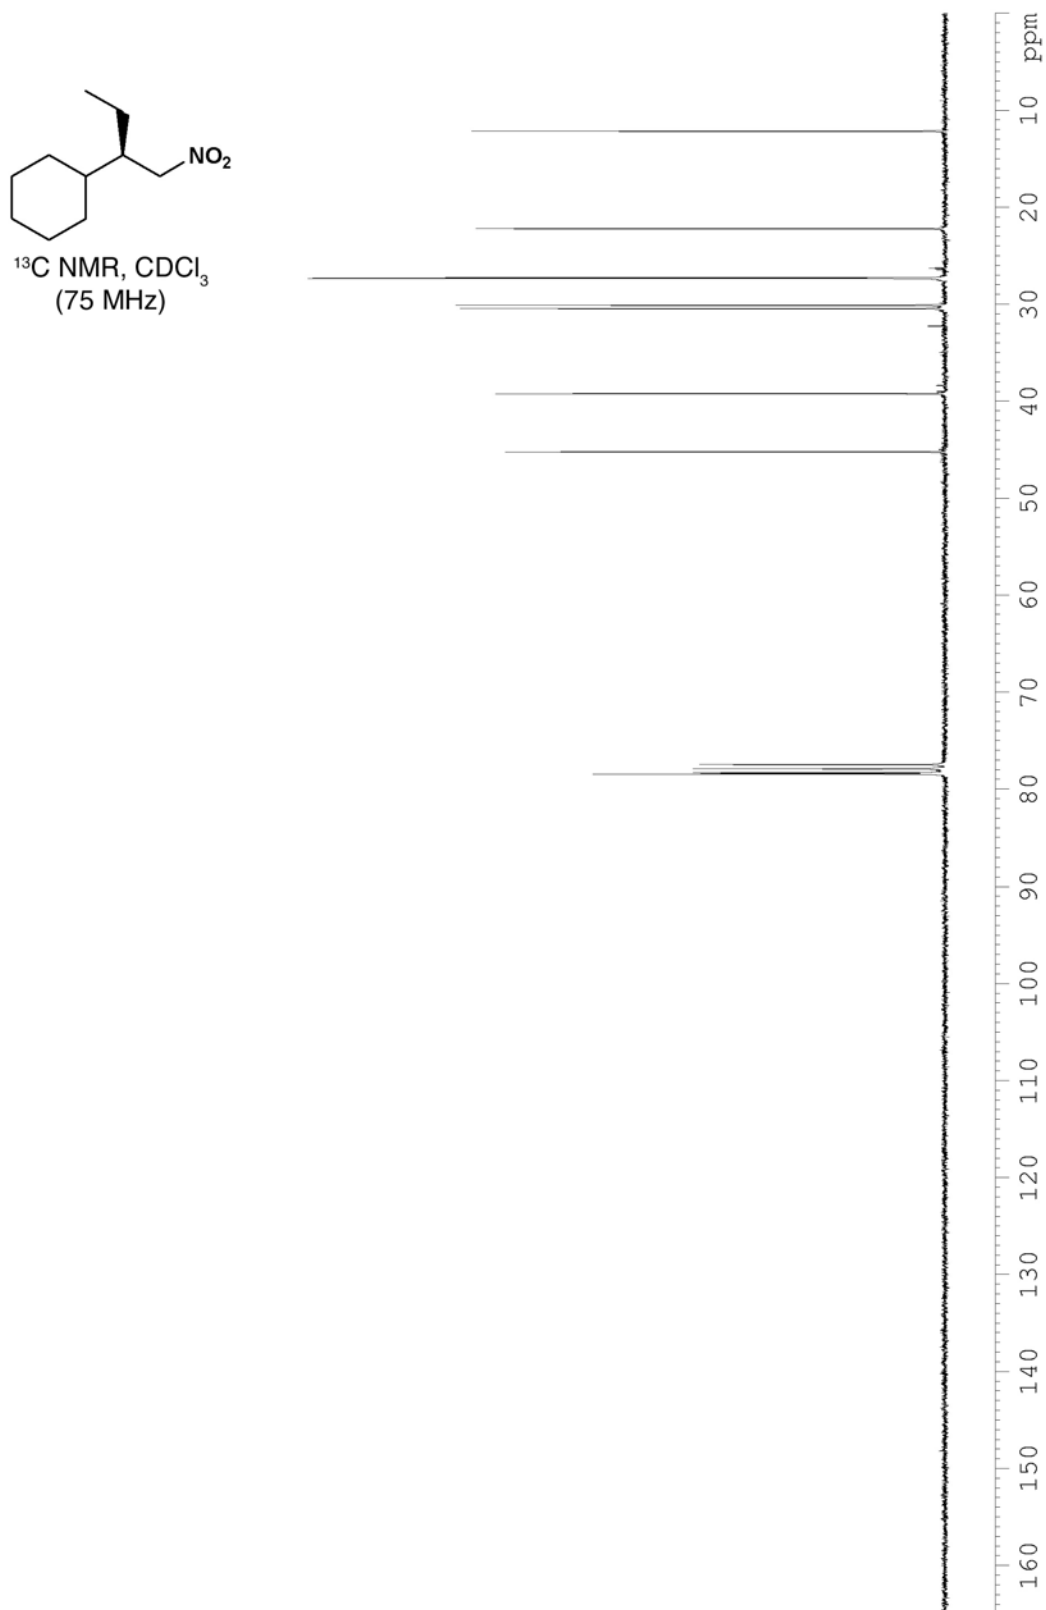

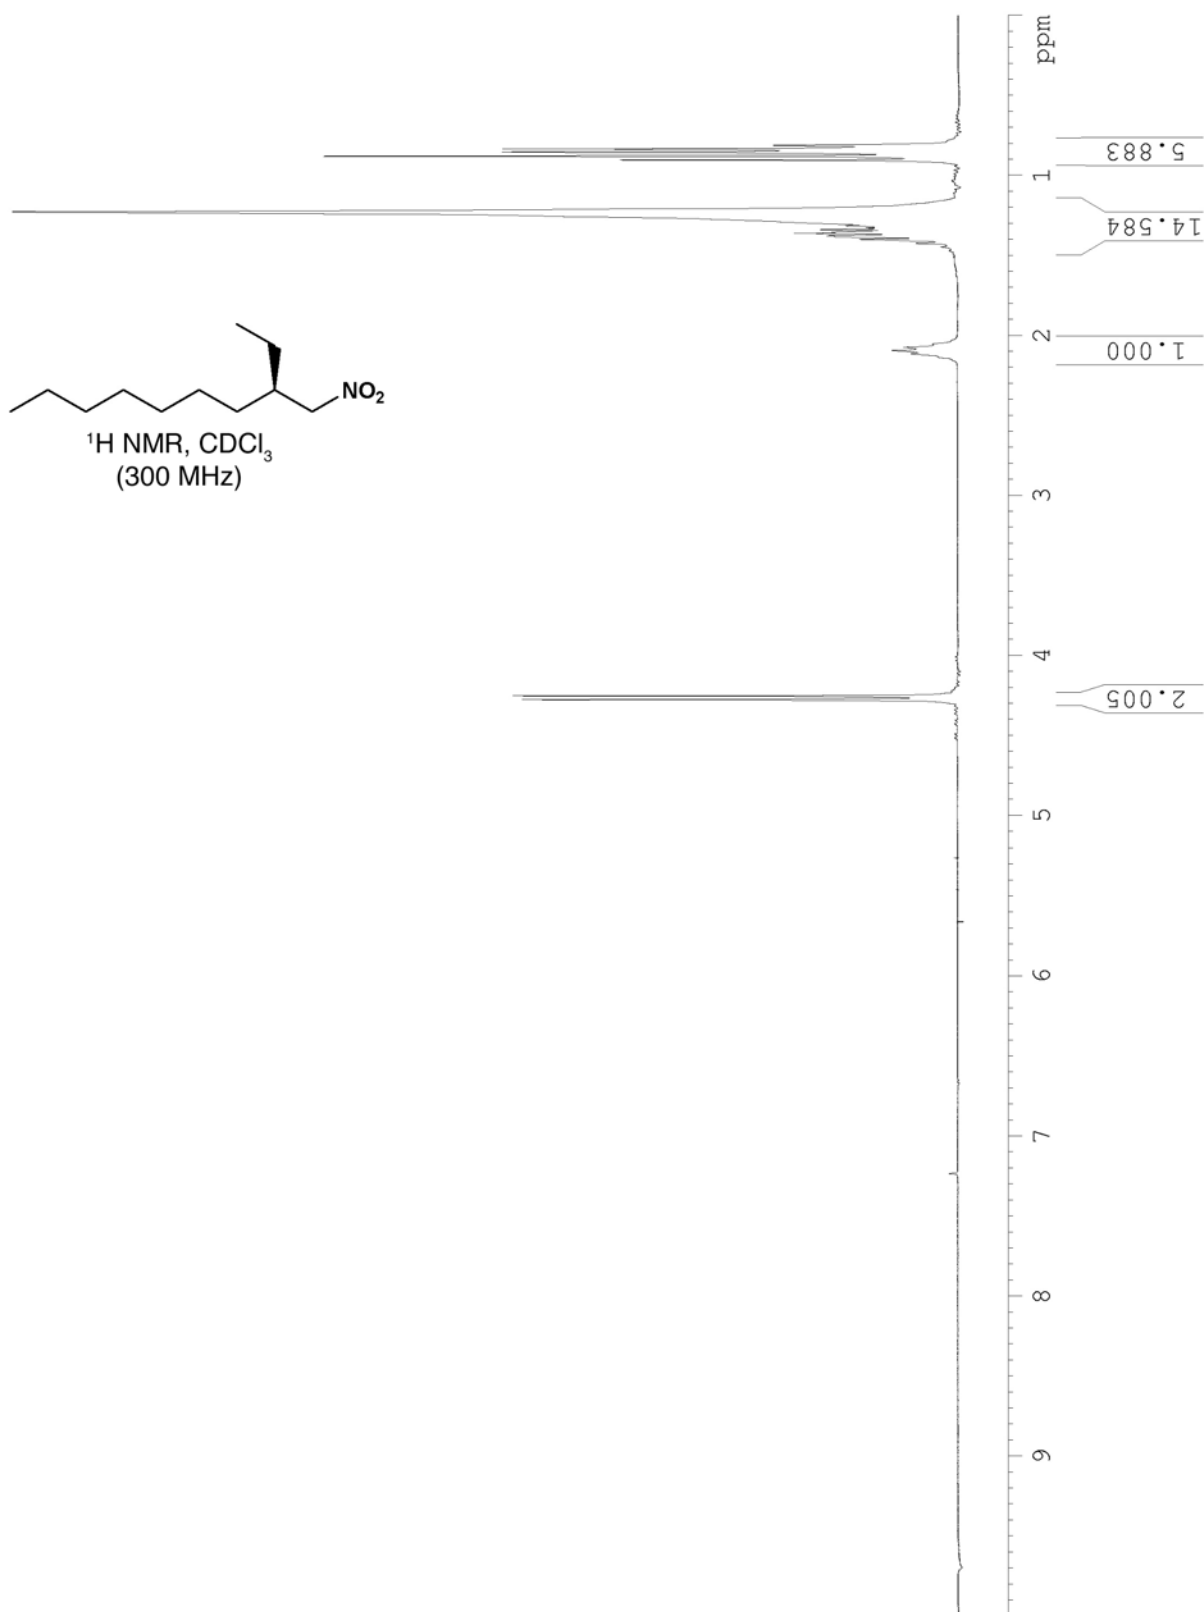

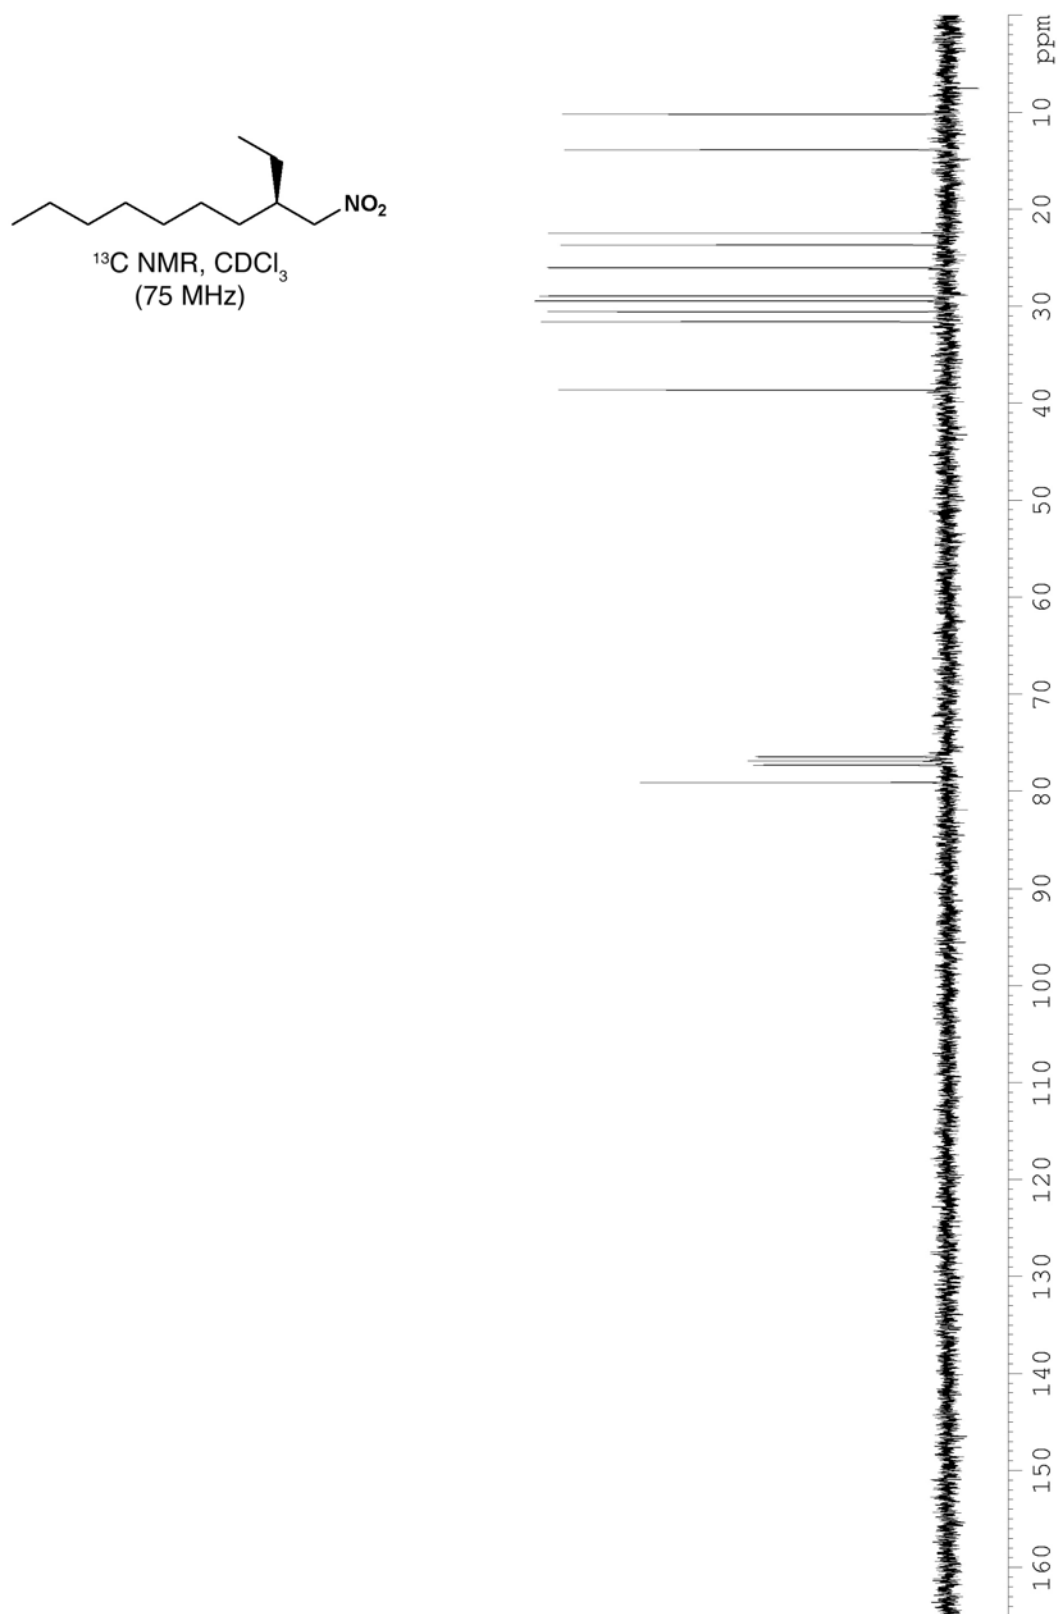

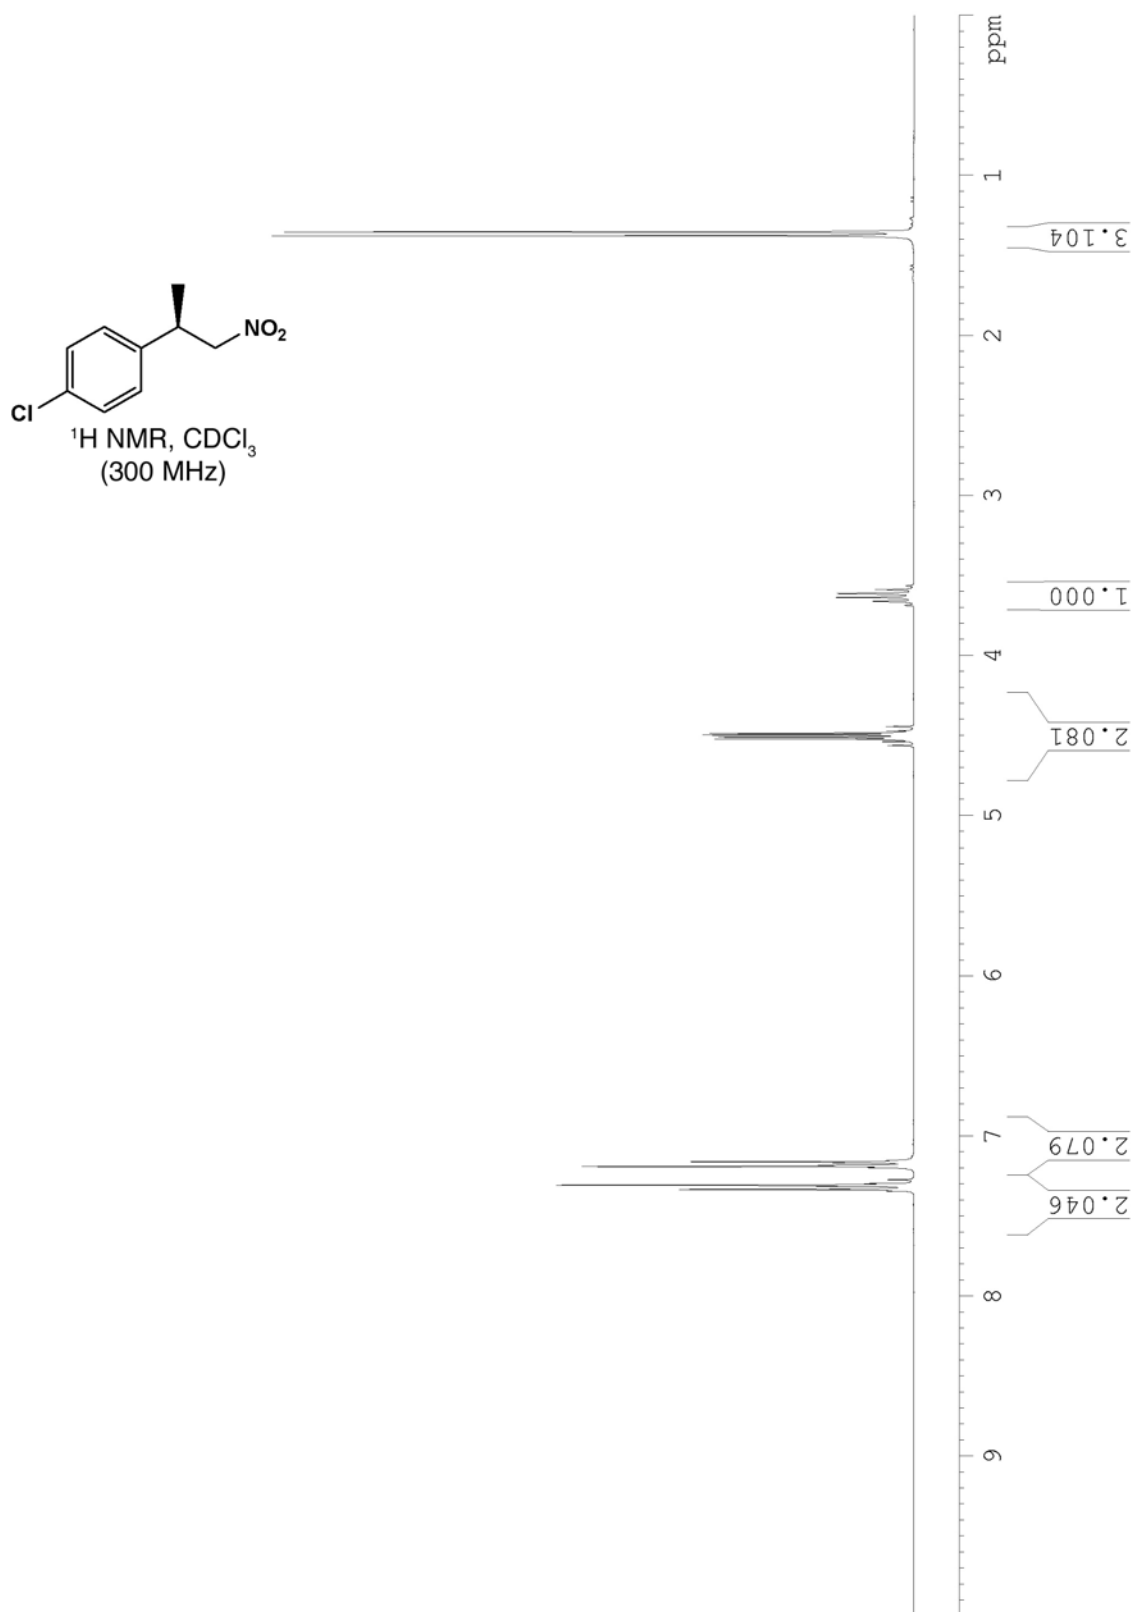

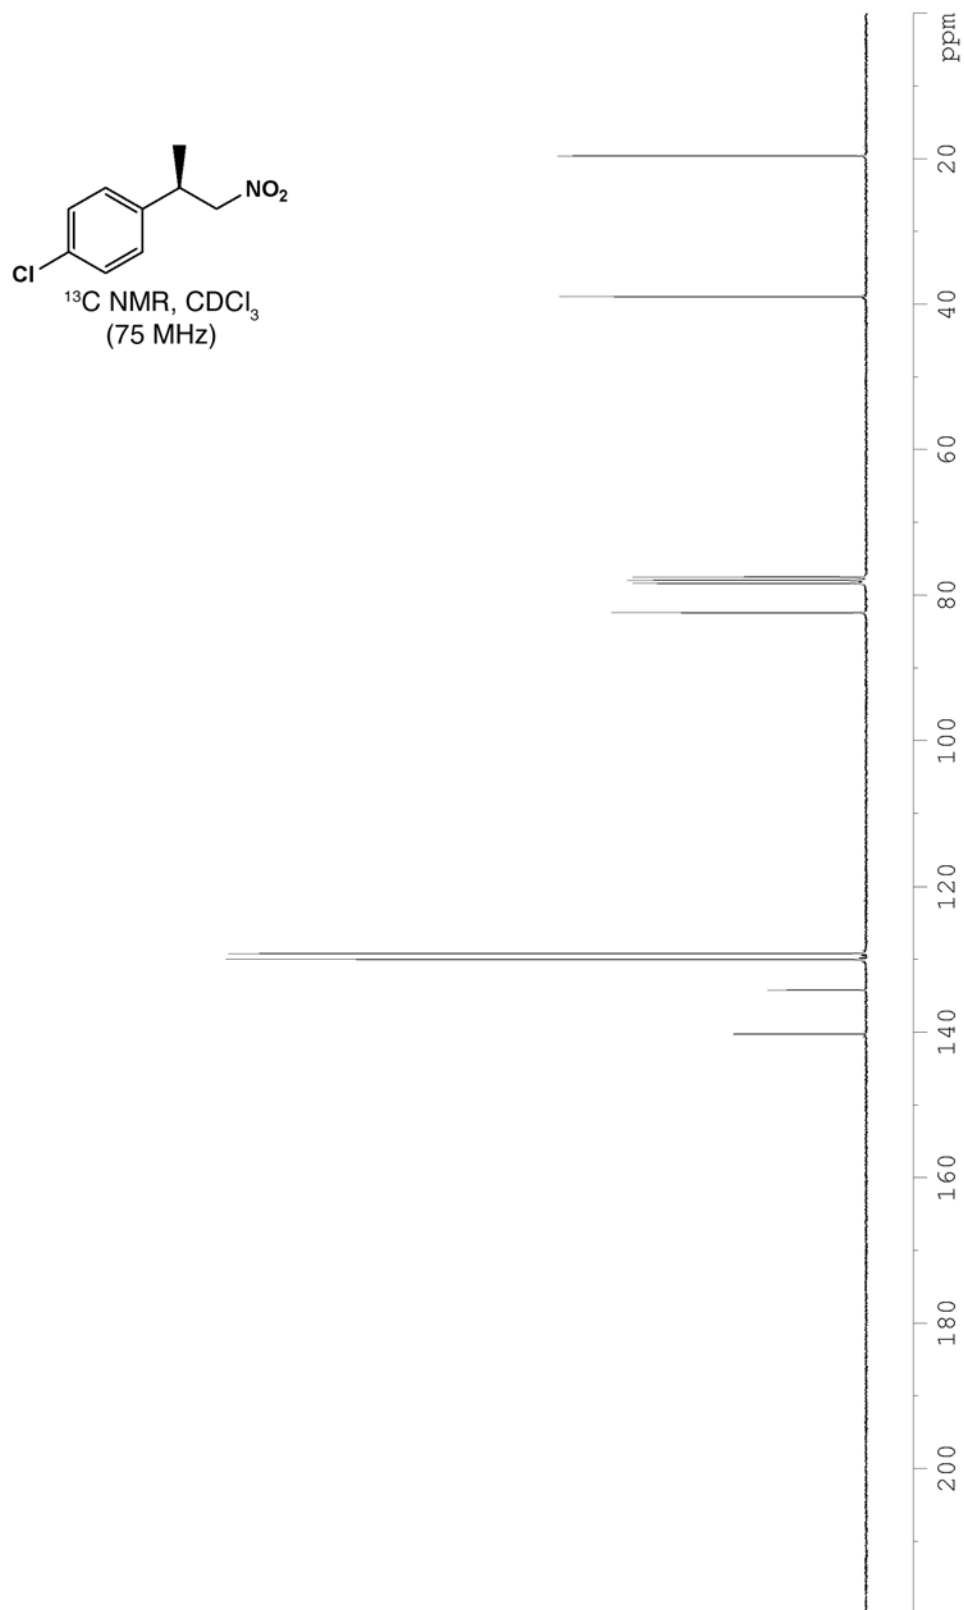

Supplement: Supplementary file 1 [file 4737415]
